# Supplementary material
Source: MDPI journal article supplement (https://www.mdpi.com/2071-1050/12/4/1407)
Supplement: s1 [file s1]

## Sheet: Information
Supplementary Material
Benchmarking the Swedish diet relative to global and regional environmental targets - identification of indicator limitations and data gaps
Emma Moberg1,*, Hanna Karlsson Potter1, Amanda Wood2, Per-Anders Hansson1, Elin Röös1
1Department of Energy and Technology, Swedish University of Agricultural Sciences, Uppsala, SE-750 07, Sweden.
2Stockholm Resilience Centre, Stockholm University, Stockholm, SE-106 91, Sweden
*Corresponding author: emma.moberg@slu.se +46 18 67 35 48
Content of this file:
Table S1. Scope of SEOs (Sveriges miljömål, 2019) where no direct connection was found relative to diets and which were not considered relevant for further analysis.
Table S2. Environmental impacts of food products and categories in the Swedish diet, per kg of food and per capita.
Table S3. Benchmarking of the Swedish diet relative to the EAT-Lancet boundaries with % of performance relative to each boundary together with lower and higher uncertainty boundaries.
Table S4. Overview of modeling choices and food supply data.
Inventory data
Reference list

## Sheet: Table S1
Table S1. Scope of Swedish Environmental Objectives, SEOs (Sveriges miljömål, 2019), where no direct connection was found relative to diets and which were not considered relevant for further analysis.
SEO	Scope of the SEO	Comment to objective
A safe radiation environment (SEO 6)	Protect human health and biodiversity from harmful effects of radiation	The Swedish diet does not affect the radiation environment.
Thriving wetlands (SEO 11)	Maintain the ecological and water-conserving function of wetlands in the landscape. Preserve valuable wetlands for the future.	Wetland drainage to make way for arable land was historically a major issue in Sweden. Wetlands can be constructed on agricultural land to reduce eutrophication impacts due to fertilize run-off from arable land. No direct link was identified between the diet and wetlands in Sweden.
Sustainable forests (SEO 12)	Protect the value of forests for biological production, biodiversity as well as cultural heritage and recreational assets.	The Swedish diet does not directly affect forest land. Indirect effects can be e.g. acidification due to emissions of ammonia from production.
A good built environment (SEO 15)	Cities, towns and other built areas should provide a good, healthy living environment and contribute to good regional and global environments. Maintain and develop natural and cultural heritages. Buildings should be located and designed according to sound environmental principles and in order to promote good long-term management of land, water and other resources	The Swedish diet does not directly affect the built environment other than via a weak link to buildings in the agricultural sector and for the food industry. This also includes urban farming which recently has gained growing attention in Sweden.

## Sheet: Table S2
Table S2. Environmental impacts of food products and categories in the Swedish diet, per kg of food and per capita.
	GHG EMISSIONS										CROPLAND USE		NITROGEN APPLICATION		PHOSPHORUS APPLICATION		CONSUMPTIVE FRESHWATER USE		EXTINCTION RATE
Per kg product (liter when marked)	kg CO2e/kg	kg CO2/kg	kg CH4/kg	kg N2O/kg	kg HCFC/kg	kg CO2e/capita	kg CO2/capita	kg CH4/capita	kg N2O/capita	kg HCFC/capita	m2/kg	m2/capita	kg N/kg	kg N/capita	kg P/kg	kg P/capita	m3/kg	m3/capita	E/MSY/kg	E/MSY/capita
Wheat flour	1.05077	0.692189	5.25303e-05	0.00119728	0	9.0398	5.95495	0.000451922	0.0103003	0	2.26003	19.4432	0.0294572	0.253423	0.00256684	0.0220827	0	0	1.59872e-13	1.37539e-12
Rye flour	0.944403	0.676624	5.30988e-05	0.00089253	0	0.155225	0.111212	8.7275e-06	0.000146699	0	2.32864	0.382743	0.0227431	0.00373813	0.00248389	0.00040826	0	0	1.64726e-13	2.70749e-14
Mixed flour from wheat and rye	1.04877	0.691898	5.25409e-05	0.00119157	0	0.517138	0.341168	2.59074e-05	0.00058755	0	2.26132	1.11503	0.0293314	0.014463	0.00256528	0.00126492	0	0	1.59963e-13	7.88762e-14
Rice	3.57956	1.80658	0.0360198	0.00183997	0	19.4676	9.82517	0.195896	0.0100068	0	4.51164	24.5368	0.0562574	0.305959	0.0134666	0.073239	0.710336	3.8632	3.19345e-11	1.73678e-10
Oats	1.0088	0.696819	6.1598e-05	0.00103988	0	3.23853	2.23699	0.000197747	0.00333833	0	3.35431	10.7683	0.0231448	0.0743013	0.00290707	0.00933253	0.000495596	0.00159101	2.37281e-13	7.61739e-13
Mix from flour or starch	0.997584	0.684407	5.28146e-05	0.00104491	0	0.442086	0.303299	2.34051e-05	0.000463057	0	2.29434	1.01675	0.0261002	0.0115665	0.00252536	0.00111913	0	0	1.62299e-13	7.19238e-14
Gruel powder	3.65896	1.10231	0.0504543	0.00282286	0	2.23051	0.671967	0.030757	0.00172081	0	5.46262	3.33001	0.10564	0.0643985	0.012167	0.00741701	0.048394	0.029501	5.81512e-12	3.5449e-12
Pasta	1.76572	1.20324	6.19858e-05	0.00188043	0	15.929	10.8548	0.000559189	0.0169638	0	2.66683	24.0582	0.0347595	0.313575	0.00302887	0.0273242	0	0	1.88649e-13	1.70185e-12
Corn flakes, roasted rice, cheese doodles, popcorn	2.89291	1.92784	0.0134105	0.00170844	0	9.43153	6.28519	0.0437211	0.00556988	0	2.19912	7.16961	0.023348	0.0761194	0.0105888	0.0345219	0.0434031	0.141503	1.4625e-11	4.76806e-11
Crispbread and flatbread	1.11435	0.837917	3.84435e-05	0.000923234	0	3.71184	2.79106	0.000128054	0.00307525	0	1.68594	5.61578	0.016466	0.0548475	0.00179833	0.00599017	0.000281633	0.000938106	1.19261e-13	3.97255e-13
Soft bread (excluding crisp bread)	1.03251	0.76146	3.23077e-05	0.000905877	0	53.9109	39.7585	0.0016869	0.0472989	0	1.37574	71.8321	0.0168304	0.878771	0.00155274	0.081074	0.000426531	0.0222706	9.73272e-14	5.08179e-12
Biscuits	1.10428	0.776214	0.000757996	0.00101439	0	4.61337	3.24282	0.00316671	0.00423787	0	2.09441	8.74992	0.0198117	0.082768	0.0041669	0.0174082	0.000493412	0.00206135	4.71109e-12	1.96817e-11
Buns	1.44776	0.769018	0.00988405	0.00114996	0	7.80446	4.14554	0.0532819	0.00619911	0	1.82961	9.86288	0.0318298	0.171585	0.00188549	0.0101641	0.00252019	0.0135856	6.3458e-13	3.42083e-12
Pastries	1.40986	0.939104	0.00185208	0.0013684	0	12.2992	8.1925	0.0161571	0.0119375	0	1.98605	17.3258	0.0255579	0.22296	0.00286938	0.0250317	0.0182349	0.159076	3.38826e-12	2.95583e-11
Home slaughter of veal, pork and mutton	20.8791	3.81021	0.353122	0.0169782	0	6.82009	1.24459	0.115346	0.00554585	0	24.1581	7.89114	0.570363	0.186307	0.0221971	0.00725058	0.294312	0.0961357	5.64425e-11	1.84367e-11
Beef including veal, fresh and frozen	34.3955	3.6401	0.685005	0.0250511	0	436.74	46.2205	8.69791	0.318088	0	36.4426	462.733	1.05492	13.3949	0.0266148	0.337943	0.200546	2.54645	1.87078e-11	2.37544e-10
Pork, fresh and frozen	7.24426	3.46328	0.0369283	0.00847454	0	112.859	53.955	0.575312	0.132026	0	13.3004	207.209	0.161279	2.51258	0.0154601	0.240854	0.356908	5.56032	3.31479e-12	5.16415e-11
Mutton, fresh and frozen	33.7216	3.30942	0.666639	0.0257353	0	41.9554	4.11747	0.82941	0.032019	0	34.7429	43.2259	0.747608	0.930149	0.06147	0.0764789	0.467437	0.58157	1.1068e-09	1.37705e-09
Poultry meat, fresh and frozen	4.18318	2.60955	0.00488479	0.00472332	0	78.913	49.2274	0.0921483	0.0891023	0	8.65146	163.204	0.118043	2.22679	0.0135585	0.255771	0.0105684	0.199365	5.74112e-12	1.08302e-10
Reindeer meat, fresh and frozen	0	0	0	0	0	0	0	0	0	0	0	0	0	0	0	0	0	0	0	0
Game meat	0	0	0	0	0	0	0	0	0	0	0	0	0	0	0	0	0	0	0	0
Edible offal	0.746925	0.181574	0.0108768	0.000656169	0	0.436678	0.106155	0.00635898	0.000383619	0	1.01672	0.594409	0.0213164	0.0124623	0.000950962	0.000555965	0.0149931	0.00876548	3.78416e-13	2.21235e-13
Cured meats and provisions, unmixed (Skinka, kassler och andra oblandade charkuterivaror)	7.24426	3.46328	0.0369283	0.00847454	0	34.8013	16.6376	0.177403	0.0407115	0	13.3004	63.895	0.161279	0.77478	0.0154601	0.0742699	0.356908	1.71458	3.31479e-12	1.59242e-11
Cured meats and provisions, mixed (Korv, pastejer och andra blandade charkuterivaror)	8.32795	1.42068	0.144387	0.00670512	0	130.435	22.2512	2.26144	0.105018	0	9.9486	155.819	0.243239	3.8097	0.00841497	0.131798	0.111491	1.74621	4.40452e-12	6.89852e-11
Canned meat (excluding meat soups)	12.0419	2.77255	0.182037	0.010331	0	10.9735	2.52657	0.165887	0.00941448	0	15.7941	14.3928	0.340764	0.310532	0.0160964	0.0146683	0.177966	0.162177	2.67824e-11	2.44063e-11
Frozen meat products and frozen ready-cooked food containing meat	3.97381	0.914941	0.0600723	0.00340925	0	37.0393	8.52803	0.559925	0.0317771	0	5.21204	48.5807	0.112452	1.04815	0.00531181	0.0495106	0.0587287	0.547401	8.83819e-12	8.23795e-11
Fish, crustaceans and molluscs	6.09865	4.5505	0.00130524	0.00347858	0.000221823	48.1911	35.9577	0.0103139	0.0274874	0.00175283	1.42831	11.2864	0.0219981	0.173827	0.00328721	0.0259753	0.00539701	0.0426467	1.83684e-12	1.45145e-11
Caviar and other products of roe	2.00586	1.68228	0.000512021	3.10592e-05	0.00014099	2.938	2.46404	0.00074996	4.54926e-05	0.000206509	0	0	0	0	0	0	0	0	0	0
Canned herring	1.13712	1.03165	0.000233925	1.41899e-05	4.43002e-05	2.86503	2.59928	0.000589384	3.57521e-05	0.000111616	0	0	0	0	0	0	0	0	0	0
Other canned fish (excluding caviar and fishballs)	1.57149	1.35696	0.000372973	2.26246e-05	9.26452e-05	1.81461	1.56689	0.000430673	2.61247e-05	0.000106978	0	0	0	0	0	0	0	0	0	0
Crustaceans and molluscs, prepared or canned	14.4429	12.5141	0.00536269	0.000325302	0.000783279	28.9975	25.1249	0.0107668	0.000653118	0.00157261	0	0	0	0	0	0	0	0	0	0
Milk	1.36935	0.324222	0.0216812	0.00103346	0	115.809	27.4202	1.83363	0.0874018	0	2.12729	179.909	0.0503716	4.26004	0.00163532	0.138302	0.00564826	0.477686	6.43408e-13	5.44144e-11
Fermented milk (yogurt etc.)	1.53822	0.49306	0.0216817	0.0010335	0	49.6757	15.923	0.700194	0.0333761	0	2.12729	68.6991	0.0503716	1.62671	0.00163532	0.0528114	0.00564826	0.182407	6.43408e-13	2.07784e-11
Cream	6.46937	1.2436	0.108408	0.00516745	0	59.9636	11.5268	1.00482	0.0478963	0	10.6364	98.5874	0.251858	2.33443	0.00817659	0.0757875	0.0282413	0.261764	3.21704e-12	2.98182e-11
Sour cream and yougurt for cooking	5.71009	1.17932	0.0939901	0.00448022	0	7.53199	1.5556	0.123979	0.00590972	0	9.22178	12.1642	0.218361	0.288033	0.0070891	0.009351	0.0244852	0.0322977	2.78917e-12	3.67911e-12
Milk powder	11.7851	2.37879	0.195134	0.00930138	0	0.147117	0.0296951	0.00243591	0.000116112	0	19.1456	0.239	0.453344	0.00565923	0.0147179	0.000183727	0.0508344	0.00063458	5.79067e-12	7.22866e-14
Hard cheese	12.5649	2.74025	0.20381	0.00971506	0	160.694	35.0454	2.60655	0.124247	0	19.9965	255.738	0.473493	6.05556	0.015372	0.196594	0.0530937	0.679022	6.04804e-12	7.73491e-11
Processed cheese	8.36322	1.97722	0.132476	0.00631479	0	8.63044	2.0404	0.136709	0.00651656	0	12.9977	13.413	0.30777	0.317604	0.00999179	0.010311	0.0345109	0.0356136	3.93122e-12	4.05683e-12
Cheese, others	10.464	2.35874	0.168143	0.00801493	0	53.5565	12.0724	0.86058	0.0410216	0	16.4971	84.4346	0.390632	1.99931	0.0126819	0.0649078	0.0438023	0.224187	4.98963e-12	2.55377e-11
Eggs	2.52644	1.51441	0.00353658	0.00299258	0	28.2478	16.9324	0.039542	0.0334596	0	4.74905	53.0985	0.0638119	0.713472	0.00700471	0.0783187	0.00589194	0.065877	2.37764e-12	2.6584e-11
Butter	12.6671	2.38274	0.213347	0.0101695	0	33.1538	6.23641	0.558399	0.0266171	0	20.9325	54.7872	0.495656	1.2973	0.0160915	0.0421168	0.0555789	0.145468	6.33114e-12	1.65707e-11
Cooking margarine excluding low-fat margarine	2.41728	0.936825	0.0184949	0.00285782	0	14.6	5.65827	0.111706	0.0172608	0	3.82269	23.0884	0.0472838	0.285586	0.00677321	0.040909	0.000181845	0.00109831	2.00951e-11	1.21371e-10
Low-fat margarine	1.27229	0.550114	0.00902191	0.00139406	0	6.04853	2.61527	0.0428906	0.00662743	0	1.86473	8.865	0.0230653	0.109653	0.003304	0.0157074	0.000606074	0.00288131	9.80249e-12	4.66015e-11
Cooking oil	2.3634	1.45609	0.000444484	0.00299395	0	4.94667	3.04764	0.00093032	0.00626642	0	14.151	29.6184	0.0854553	0.178861	0.0272572	0.0570502	0.697628	1.46016	1.36155e-10	2.84977e-10
Carrots	0.298371	0.270511	4.09731e-06	9.30209e-05	0	3.24107	2.93844	4.45072e-05	0.00101044	0	0.212251	2.30559	0.00185929	0.0201966	0.000650436	0.00706538	2.33941e-05	0.000254119	1.50144e-14	1.63095e-13
Other roots	0.328004	0.286216	5.83998e-06	0.000139562	0	0.585523	0.510927	1.0425e-05	0.000249134	0	0.334892	0.597818	0.00350536	0.00625745	0.0017004	0.0030354	0.00724554	0.0129341	3.65233e-14	6.51981e-14
Cucumbers	0.688423	0.608045	0.00130557	0.000120767	0	4.07345	3.59785	0.00772514	0.00071459	0	0.0974942	0.576881	0.0033305	0.0197068	0.00356544	0.021097	0.0137725	0.0814931	8.30602e-13	4.91474e-12
Onion	0.381612	0.329325	5.99851e-06	0.000174779	0	3.32591	2.8702	5.22795e-05	0.00152327	0	0.310738	2.70821	0.00379689	0.0330915	0.0018144	0.0158133	0.0265995	0.231825	3.68613e-14	3.21261e-13
Leek	0.395561	0.325569	6.12754e-06	0.000234175	0	0.396679	0.326488	6.14484e-06	0.000234837	0	0.369729	0.370773	0.00699428	0.00701403	0.000726132	0.000728183	0.0173168	0.0173657	5.69187e-14	5.70794e-14
Cauliflower	0.531404	0.384211	1.12471e-05	0.000492652	0	0.783878	0.566752	1.65906e-05	0.000726716	0	0.678636	1.00106	0.0131947	0.0194636	0.00186406	0.0027497	0.0531262	0.0783669	4.21331e-12	6.21509e-12
Cabbages (white, red, brussel sprouts, kale, broccoli, napa cabbage)	0.493443	0.339116	1.17352e-05	0.00051654	0	2.34996	1.615	5.58872e-05	0.00245996	0	0.708089	3.37218	0.0123231	0.0586872	0.0017818	0.00848558	0.025205	0.120036	1.45399e-12	6.92443e-12
Lettuce	0.322648	0.276033	7.90575e-06	0.000155522	0	2.05614	1.75908	5.03811e-05	0.000991098	0	0.477027	3.03996	0.00487057	0.0310388	0.001011	0.00644281	0.014607	0.0930865	1.19798e-12	7.63436e-12
Tomatoes	1.42062	1.24355	0.00404219	0.000132979	0	14.2404	12.4655	0.0405192	0.00133299	0	0.0750908	0.752716	0.00316276	0.0317038	0.000668165	0.00669774	0.00699367	0.0701052	6.8828e-13	6.89937e-12
Other vegetables	0.540009	0.451398	0.000600079	0.000228889	0	8.24997	6.89621	0.00916768	0.00349684	0	0.362661	5.54054	0.00589305	0.0900308	0.00153132	0.0233946	0.0183211	0.2799	9.47719e-13	1.44787e-11
Canned and prepared vegetables	0.862378	0.773767	0.000600079	0.000228889	0	13.2629	11.9001	0.00922885	0.00352017	0	0.362661	5.57751	0.00589305	0.0906316	0.00153132	0.0235507	0.0183211	0.281767	9.47719e-13	1.45754e-11
Oranges, tangerines, clementins etc.	0.728614	0.585582	1.60044e-05	0.00047815	0	10.6171	8.5329	0.000233211	0.00696744	0	0.675983	9.8502	0.014048	0.204703	0.00347505	0.0506373	0.166959	2.43287	1.14526e-11	1.66884e-10
Lemons, lime, grapefruit etc.	0.456372	0.378068	1.60907e-05	0.000260929	0	1.50656	1.24807	5.31182e-05	0.000861371	0	0.679631	2.24358	0.0078261	0.0258353	0.00178637	0.00589711	0.18976	0.626432	1.15144e-11	3.80111e-11
Grapes	0.650407	0.598773	0.000583788	0.000106662	0	1.59949	1.47251	0.00143566	0.000262304	0	1.36261	3.35095	0.0025718	0.00632459	0.00171025	0.00420585	0.113544	0.279229	4.28753e-12	1.05439e-11
Almonds and nuts, fresh and processed	3.0317	2.36455	0.00562552	0.00157772	0	9.34156	7.28587	0.0173339	0.00486142	0	11.9062	36.6866	0.11784	0.3631	0.00353708	0.0108988	1.90377	5.86608	8.6066e-11	2.65195e-10
Apples, fresh	0.369673	0.348622	3.20219e-05	6.69864e-05	0	3.85393	3.63447	0.000333836	0.00069835	0	0.601124	6.26687	0.00213248	0.0222316	0.00111042	0.0115764	0.0273183	0.2848	2.78795e-12	2.90651e-11
Pears, fresh	0.399295	0.302957	2.45248e-05	0.000320484	0	1.37869	1.04605	8.46791e-05	0.00110657	0	0.460385	1.58962	0.00961861	0.0332111	0.00248048	0.00856461	0.00170712	0.00589436	8.67042e-14	2.99372e-13
Cherries, peaches, plums and other fresh stone fruits	0.481985	0.432747	0.00065336	9.06837e-05	0	1.50319	1.34963	0.00203766	0.000282819	0	0.686832	2.14205	0.00200915	0.00626602	0.00209782	0.00654256	0.19132	0.596678	9.76254e-12	3.04468e-11
Bananas	0.672615	0.629109	6.09829e-06	0.000145298	0	10.4556	9.7793	9.4796e-05	0.00225861	0	0.515151	8.00786	0.00379806	0.0590397	2.75727e-05	0.00042861	0.0690072	1.0727	3.2126e-11	4.99388e-10
Melon, kiwi and other fruits	1.19317	1.09314	0.00112278	0.000207567	0	12.0397	11.0304	0.0113296	0.00209448	0	0.558098	5.63154	0.00515816	0.0520489	0.00559486	0.0564555	0.105512	1.06468	5.24822e-12	5.29577e-11
Strawberries, fresh	0.735457	0.644373	0.00119385	0.000169441	0	1.49955	1.31384	0.00243419	0.000345479	0	1.43398	2.9238	0.00553158	0.0112785	0.00245601	0.00500766	0.0947905	0.193272	1.21525e-13	2.47781e-13
Raspberries, fresh	0.759482	0.544712	8.63334e-05	0.000710853	0	0.0963665	0.0691155	1.09544e-05	9.01963e-05	0	2.43101	0.308458	0.0243101	0.00308458	0.00303877	0.000385572	0.00664359	0.000842969	2.84973e-13	3.61586e-14
Other berries, fresh	0.74747	0.594543	0.000640092	0.000440147	0	0.348374	0.277099	0.000298329	0.00020514	0	1.9325	0.900682	0.0149209	0.00695418	0.00274739	0.00128048	0.0507171	0.0236378	2.03249e-13	9.47284e-14
Strawberries, raspberries, black currant, blueberries, lingonberries and other berries, chilled	0.74747	0.594543	0.000640092	0.000440147	0	0.985963	0.784242	0.000844325	0.000580584	0	1.9325	2.54909	0.0149209	0.0196816	0.00274739	0.00362399	0.0507171	0.0668992	2.03249e-13	2.68099e-13
Raisins, figs, dates and other dried fruits	1.91126	1.91126	0	0	0	2.50916	2.50916	0	0	0	3.94716	5.18193	0.00739945	0.00971419	0.00492063	0.00645994	0.324993	0.426659	1.58627e-11	2.08249e-11
Fruits and berries, prepared in canns or in other packaging	0.644707	0.555808	0.000373486	0.000255705	0	2.10054	1.8109	0.00121687	0.000833123	0	0.940481	3.06422	0.00770041	0.025089	0.00237776	0.00774707	0.0966562	0.314919	7.76724e-12	2.53068e-11
Jam, marmalades, mashed fruits and jellies, cooked	1.22424	0.982888	0.000812443	0.000717205	0	9.00649	7.23093	0.00597699	0.00527634	0	2.46987	18.1704	0.0192741	0.141796	0.00352915	0.0259633	0.0642881	0.472956	2.47564e-13	1.82128e-12
Soups and clear soups containing vegetables, berries, fruit, fish and meat	4.70165	1.56023	0.0596594	0.00345736	0	17.2457	5.72293	0.218831	0.0126816	0	4.68155	17.172	0.0967554	0.354899	0.00656832	0.0240926	0.0591281	0.216882	4.89714e-11	1.79627e-10
Squash drink and juice of vegetables, fruits, berries, natural or concentrated (liter)	1.21425	1.03237	0.000423923	0.000561948	0	25.8946	22.016	0.00904042	0.0119839	0	1.71949	36.6691	0.01656	0.353153	0.00367378	0.0783457	0.1155	2.46311	5.2009e-12	1.10912e-10
Potato, fresh	0.357637	0.30192	7.58265e-06	0.000186103	0	16.1577	13.6405	0.000342577	0.00840797	0	0.457532	20.6709	0.00515142	0.232737	0.00275036	0.124259	0.0144677	0.653637	5.80321e-14	2.62184e-12
Potato starch	1.28094	0.983448	0.0015395	0.000822654	0	0.159904	0.122767	0.000192181	0.000102694	0	1.83013	0.22846	0.0206057	0.00257227	0.0110015	0.00137334	0.0578707	0.00722417	2.05923e-13	2.5706e-14
Powder for mashed potatoes or turnips	1.28094	0.983448	0.0015395	0.000822654	0	0.423745	0.325332	0.000509279	0.00027214	0	1.83013	0.605419	0.0206057	0.00681651	0.0110015	0.00363936	0.0578707	0.019144	2.05923e-13	6.81209e-14
Chilled and deep frozen potato products	1.62528	1.11488	0.00670903	0.00094727	0	14.2968	9.80712	0.0590164	0.00833271	0	1.32833	11.6847	0.0142497	0.125348	0.0066696	0.0586695	0.0289354	0.254532	7.3415e-12	6.45799e-11
Canned potato	0.723172	0.667456	7.58265e-06	0.000186103	0	0.150459	0.138867	1.57761e-06	3.87197e-05	0	0.457532	0.0951917	0.00515142	0.00107178	0.00275036	0.000572226	0.0144677	0.00301007	5.80321e-14	1.20739e-14
Other prepared potato products (potato crisps)	2.89291	1.92784	0.0134105	0.00170844	0	5.53734	3.69009	0.0256691	0.00327013	0	2.19912	4.20934	0.023348	0.0446904	0.0105888	0.0202681	0.0434031	0.083078	1.4625e-11	2.79937e-11
Sugar and sugar-based products	1.44261	1.23257	0.000270675	0.000673972	0	9.4665	8.08816	0.00177618	0.00442263	0	1.61003	10.5651	0.0157246	0.103186	0.00257604	0.0169041	0.0336765	0.220987	1.13892e-13	7.47362e-13
Coffee, roasted powder	6.40623	3.59373	0.000554648	0.00937462	0	49.1954	27.5974	0.00425931	0.0719906	0	26.1724	200.986	0.246249	1.89102	0.0497838	0.382305	0.359247	2.75876	1.08097e-10	8.30107e-10
Tea (processed leaves)	6.35523	5.28443	0.0174939	0.00159732	0	1.95691	1.62719	0.00538675	0.000491849	0	32.5115	10.011	0.140133	0.0431499	0.040038	0.0123286	4.26319	1.31272	9.18825e-11	2.82926e-11
Coffee and tea extractions, e.g. instant coffee	6.40426	3.65891	0.00120769	0.0090748	0	2.06528	1.17994	0.000389461	0.00292648	0	26.4168	8.51901	0.242158	0.0780922	0.049408	0.0159333	0.50975	0.164387	1.07472e-10	3.4658e-11
Cocoa powder, drinking chocolate and chocolate sauces	2.80845	1.96927	0.000164951	0.00279722	0	7.7246	5.41645	0.000453694	0.0076937	0	25.7567	70.8433	0.0758949	0.208748	0.101124	0.27814	0.0219976	0.060504	1.60078e-10	4.40293e-10
Honey	1.83633	1.83633	0	0	0	1.41361	1.41361	0	0	0	0.00373836	0.0028778	0	0	0	0	0	0	3.0099e-15	2.31703e-15
Chocolate and confectionary	5.12624	3.24538	0.0314258	0.0027261	0	81.6968	51.7217	0.500833	0.0434458	0	18.7217	298.368	0.110161	1.75564	0.0646137	1.02975	0.0327941	0.52264	9.92706e-11	1.58208e-09
Sauces, including mayonnaise and other prepared products for flavoring	3.12655	0.986221	0.0403442	0.00257929	0	46.738	14.7428	0.603095	0.0385571	0	5.82527	87.0804	0.107271	1.60357	0.00673462	0.100674	0.342769	5.12396	1.4144e-11	2.11435e-10
Ice cream including mix containing fat (liter)	4.28146	1.26123	0.0645306	0.00277243	0	40.0583	11.8004	0.603762	0.0259395	0	5.36732	50.2178	0.122492	1.14606	0.00450017	0.0421046	0.0185938	0.173967	1.59931e-12	1.49635e-11
Ice cream not containing fat (liter)	1.22424	0.982888	0.000812443	0.000717205	0	0.654601	0.525551	0.000434414	0.00038349	0	2.46987	1.32064	0.0192741	0.0103059	0.00352915	0.00188704	0.0642881	0.0343749	2.47564e-13	1.32373e-13
Spices, including mustard	0.980443	0.804297	0	0.000591093	0	1.72776	1.41735	0	0.00104164	0	3.07388	5.41686	0.0260769	0.0459533	0.00614763	0.0108335	0.0557385	0.0982237	8.68561e-12	1.5306e-11
Salt	0.548557	0.534066	0.000356257	7.98314e-06	0	0.576357	0.56113	0.000374311	8.3877e-06	0	0	0	0	0	0	0	0	0	0	0
Soda, cider etc. (liter)	0.441879	0.41023	3.10919e-05	0.000102658	0	38.735	35.9606	0.00272551	0.00899896	0	0.226612	19.8647	0.00183858	0.16117	0.000377474	0.0330892	0.00710653	0.622956	1.76048e-13	1.54323e-11
Mineral water and soda water, without sugar or flavoring (liter)	0.277241	0.277241	0	0	0	2.75659	2.75659	0	0	0	0	0	0	0	0	0	0.001	0.00994294	0	0
Light beer, <2.25 % alcohol (liter)	0.407242	0.364216	6.17258e-06	0.000160176	0	1.26161	1.12832	1.91222e-05	0.000496216	0	0.433435	1.34275	0.00335716	0.0104003	0.000359901	0.00111495	0.000882653	0.0027344	2.79013e-14	8.64363e-14
Beer, 2.25 - 3.5% alcohol (liter)	0.461326	0.396262	8.37707e-06	0.000217382	0	6.18503	5.3127	0.000112312	0.00291445	0	0.610019	8.17856	0.0047249	0.0633469	0.000506528	0.00679105	0.000826531	0.0110813	3.92684e-14	5.26474e-13
Beer >3.5 % (liter)	0.535078	0.447534	1.19043e-05	0.000308911	0	17.4881	14.6269	0.000389071	0.0100963	0	0.850816	27.8075	0.00658999	0.215383	0.000706473	0.0230899	0.00075	0.0245125	5.47691e-14	1.79004e-12
Wine (liter)	2.52281	2.52281	0	0	0	61.1803	61.1803	0	0	0	1.87938	45.5766	0.00392154	0.0951007	0.00260782	0.0632419	0.18307	4.43962	2.03645e-11	4.93856e-10
Spirits (liter)	1.99208	1.99208	0	0	0	4.96939	4.96939	0	0	0	5.89603	14.7081	0.0769464	0.191949	0.0070538	0.0175962	7.01718e-05	0.000175049	1.68975e-12	4.2152e-12

## Sheet: Table S3
Table S3. Benchmarking of the Swedish diet relative to the EAT-Lancet boundaries with % of performance relative to each boundary together with lower and higher uncertainty boundaries.
	GHG EMISSIONS, TON	CROPLAND USE, HA	NITROGEN APPLICATION, KG	PHOSPHORUS APPLICATION, KG	CONSUMPTIVE FRESHWATER USE, M3	EXTINCTION RATE, E/MSY
Overall impact for the Swedish population	2.15203e+07	3.2237e+06	552964	47925.3	5.31459e+08	0.0794183
Overall impact per capita	2.2387	0.335353	0.0575234	0.00498554	55.2863	8.26167e-09
Global target downscaled per capita*	0.677525	0.176157	0.0121955	0.00108404	338.763	1.35505e-09
% of minimum uncertainty range	305.947	164.989	326.547	229.952	10.2	76.2119
% of target	330.423	190.372	471.679	459.904	16.3201	609.695
% of maximum uncertainty range	351.514	224.986	653.094	613.205	40.8002	6096.95
*Using data of world population in 2015 (FAOSTAT, 2019).

## Sheet: Table S4
Table S4. Overview of modeling choices and food supply data.
	Modeling choice	Data of average food supply 2011-2015, kg or liter	Reference to food supply data
Wheat flour	Based on system model of wheat flour from Moberg et al. (2019).	82700000	SBA (2019a)
Rye flour	Based on system model of rye flour from Moberg et al. (2019).	1580000	SBA (2019a)
Mixed flour from wheat and rye	Average of data of wheat flour and rye flour based on consumption-levels for each product.	4740000	SBA (2019a)
Rice	Based on system model of rice from Moberg et al. (2019).	5.228e+07	SBA (2019a)
Oats	Based on system model of oats from Moberg et al. (2019).	3.086e+07	SBA (2019a)
Mix from flour or starch	Average of data of wheat flour and rye flour based on consumption-levels for each product.	4260000	SBA (2019a)
Gruel powder	Based on system model of follow-up formula from Moberg et al. (2019). Ingredients list in Moberg et al. (2019) and environmental impacts of ingredients based on data from this study.	5.86e+06	SBA (2019a)
Pasta	Based on system model of pasta from Moberg et al. (2019). Ingredients list in Moberg et al. (2019) and environmental impacts of ingredients based on data from this study.	86720000	SBA (2019a)
Corn flakes, roasted rice, cheese doodles, popcorn	Based on system model of potato crisps from Moberg et al. (2019). Ingredients list in Moberg et al. (2019) and environmental impacts of ingredients based on data from this study.	3.134e+07	SBA (2019a)
Crispbread and flatbread	Based on system model of crisp bread from Moberg et al. (2019). Ingredients list in Moberg et al. (2019) and environmental impacts of ingredients based on data from this study.	3.202e+07	SBA (2019a)
Soft bread (excluding crisp bread)	Based on average of wheat bread and wheat-rye bread. System models from Moberg et al. (2019). Ingredients list in Moberg et al. (2019) and environmental impacts of ingredients based on data from this study.	5.0192e+08	SBA (2019a)
Biscuits	Based on system model of biscuits from Moberg et al. (2019). Ingredients list in Moberg et al. (2019) and environmental impacts of ingredients based on data from this study.	4.016e+07	SBA (2019a)
Buns	Based on system model of buns from Moberg et al. (2019). Ingredients list in Moberg et al. (2019) and environmental impacts of ingredients based on data from this study.	5.182e+07	SBA (2019a)
Pastries	Based on system model of pastries from Moberg et al. (2019). Ingredients list in Moberg et al. (2019) and environmental impacts of ingredients based on data from this study.	8.386e+07	SBA (2019a)
Home slaughter of veal, pork and mutton	Average of data of beef, pork meat and sheep meat based on consumption-levels for each product.	3.14e+06	SBA (2019a)
Beef including veal, fresh and frozen	Based on system model of beef from Moberg et al. (2019). Data of GHG emissions and cropland use for rest of the world/extensive suckler cows and offsprings are adjusted so that no electricity use in stables is accounted for as the animals are assumed to be grazing all year around (Cederberg et al., 2009b). Conversion from carcass weight to bone free meat and economic allocation between meat and e…	1.2206e+08	SBA (2019a)
Pork, fresh and frozen	Based on system model of pork meat from Moberg et al. (2019). Conversion from carcass weight to bone free meat and economic allocation between meat and edible by-products from meat production.	149760000	SBA (2019a)
Mutton, fresh and frozen	Conversion from carcass weight to bone free meat.	1.196e+07	SBA (2019a)
Poultry meat, fresh and frozen	Based on system model of poultry meat from Moberg et al. (2019). Conversion from carcass weight to bone free meat.	181340000	SBA (2019a)
Reindeer meat, fresh and frozen	Assumed to be zero	1300000	SBA (2019a)
Game meat	Assumed to be zero	17600000	SBA (2019a)
Edible offal	Average of data of beef and pork meat based on consumption-levels for each product. Economic allocation between meat (beef and pork) and edible by-products from the production.	5.62e+06	SBA (2019a)
Cured meats and provisions, unmixed (Skinka, kassler och andra oblandade charkuterivaror)	Based on data of pork meat.	46180000	SBA (2019a)
Cured meats and provisions, mixed (Korv, pastejer och andra blandade charkuterivaror)	Based on standard sausage with meat content of 40% of which 50% beef and 50% pork (Röös, 2014). Data of beef and pork from this study.	150560000	SBA (2019a)
Canned meat (excluding meat soups)	Average of data on meat products (beef, pork meat, poultry meat, sheep meat, edible intestines, ham etc., sausages etc.) based on consumption-levels for each product.	8.76e+06	SBA (2019a)
Frozen meat products and frozen ready-cooked food containing meat	Based on prepared meals with meat content of 33% (Röös, 2014). Data on meat is an average of meat products (beef, pork meat, poultry meat, sheep meat, edible intestines, ham etc., sausages etc.) based on consumption-levels for each product.	8.96e+07	SBA (2019a)
Fish, crustaceans and molluscs	Based on system models of largest species of fish and seafood on the Swedish market from Moberg et al. (2019).	75960000	SBA (2019a)
Caviar and other products of roe	Based on system model of roe from cod fish from Moberg et al. (2019).	1.408e+07	SBA (2019a)
Canned herring	Based on system model of herring from Moberg et al. (2019).	24220000	SBA (2019a)
Other canned fish (excluding caviar and fishballs)	Average of data of caviar etc and canned herring.	11100000	SBA (2019a)
Crustaceans and molluscs, prepared or canned	Based on system model of prawns from Moberg et al. (2019).	19300000	SBA (2019a)
Milk	Based on system model of milk with fat content of 3% from Moberg et al. (2019). Ingredients list in Moberg et al. (2019) and environmental impacts of ingredients based on data from this study.	8.1298e+08	SBA (2019a)
Fermented milk (yogurt etc.)	Based on system model of yougurt with fat content of 3% from Moberg et al. (2019). Ingredients list in Moberg et al. (2019) and environmental impacts of ingredients based on data from this study.	3.1044e+08	SBA (2019a)
Cream	Based on system model of cream with fat content of 40% from Moberg et al. (2019). Ingredients list in Moberg et al. (2019) and environmental impacts of ingredients based on data from this study.	89100000	SBA (2019a)
Sour cream and yougurt for cooking	Based on system model of cream fraiche with fat content of 34% from Moberg et al. (2019). Ingredients list in Moberg et al. (2019) and environmental impacts of ingredients based on data from this study.	1.268e+07	SBA (2019a)
Milk powder	Based on system model of milk powder from Moberg et al. (2019). Ingredients list in Moberg et al. (2019) and environmental impacts of ingredients based on data from this study.	120000	SBA (2019a)
Hard cheese	Based on system model of hard cheese from Moberg et al. (2019). Ingredients list in Moberg et al. (2019) and environmental impacts of ingredients based on data from this study.	1.2294e+08	SBA (2019a)
Processed cheese	Based on system model of dessert cheese from Moberg et al. (2019). Ingredients list in Moberg et al. (2019) and environmental impacts of ingredients based on data from this study.	9920000	SBA (2019a)
Cheese, others	Average of data of hard cheese and processed cheese.	49200000	SBA (2019a)
Eggs	Based on system model of eggs from Moberg et al. (2019).	1.0748e+08	SBA (2019a)
Butter	Based on system model of butter with fat content of 80% from Moberg et al. (2019). Ingredients list in Moberg et al. (2019) and environmental impacts of ingredients based on data from this study.	25160000	SBA (2019a)
Cooking margarine excluding low-fat margarine	Based on system model of margarine from Moberg et al. (2019). Ingredients list in Moberg et al. (2019) and environmental impacts of ingredients based on data from this study.	5.806e+07	SBA (2019a)
Low-fat margarine	Based on system model of low fat margarine from Moberg et al. (2019). Ingredients list in Moberg et al. (2019) and environmental impacts of ingredients based on data from this study.	45700000	SBA (2019a)
Cooking oil	Based on average of olive oil and rapeseed oil (Amcoff, 2012). System models from Moberg et al. (2019).	2.012e+07	SBA (2019a)
Carrots	Based on system model of carrot from Moberg et al. (2019).	104420000	SBA (2019a)
Other roots	Average of data of fresh potatoes and carrots.	1.716e+07	SBA (2019a)
Cucumbers	Based on system model of cucumber from Moberg et al. (2019).	5.688e+07	SBA (2019a)
Onion	Based on system model of onion from Moberg et al. (2019).	83780000	SBA (2019a)
Leek	Based on system model of leek from Moberg et al. (2019).	9640000	SBA (2019a)
Cauliflower	Based on system model of cauliflower from Moberg et al. (2019).	1.418e+07	SBA (2019a)
Cabbages (white, red, brussel sprouts, kale, broccoli, napa cabbage)	Based on average of white cabbage and broccoli. System models from Moberg et al. (2019).	45780000	SBA (2019a)
Lettuce	Based on system model of iceberg lettuce from Moberg et al. (2019)	6.126e+07	SBA (2019a)
Tomatoes	Based on system model of tomato from Moberg et al. (2019).	9.636e+07	SBA (2019a)
Other vegetables	Average of data of vegetables (carrot, cucumber, onion, leek, cauliflower, cabbages, lettuce and tomato).	1.4686e+08	SBA (2019a)
Canned and prepared vegetables	Average of data of vegetables (carrot, cucumber, onion, leek, cauliflower, cabbages, lettuce and tomato) for all environmental categories except for GHG emissions where data is adjusted to other packaging, average of glass and metal packaging with data from Moberg et al. (2019).	1.4784e+08	SBA (2019a)
Oranges, tangerines, clementins etc.	Based on system model of orange from Moberg et al. (2019).	1.40075e+08	Eidstedt, M., pers. comm. (2018)
Lemons, lime, grapefruit etc.	Based on system model of lemon from Moberg et al. (2019).	31733715	Eidstedt, M., pers. comm. (2018)
Grapes		2.364e+07	SBA (2019a)
Almonds and nuts, fresh and processed	Based on average of almonds and peanuts, without shell.	2.962e+07	SBA (2019a)
Apples, fresh	Based on system model of apple from Moberg et al. (2019).	1.00216e+08	Eidstedt, M., pers. comm. (2018)
Pears, fresh	Based on system model of pear from Moberg et al. (2019).	3.31913e+07	Eidstedt, M., pers. comm. (2018)
Cherries, peaches, plums and other fresh stone fruits	Based on data of peaches.	29980000	SBA (2019a)
Bananas	Based on system model of banana from Moberg et al. (2019).	149428800	Eidstedt, M., pers. comm. (2018)
Melon, kiwi and other fruits	Based on average of melons and kiwi. System models from Moberg et al. (2019).	9.69994e+07	Eidstedt, M., pers. comm. (2018)
Strawberries, fresh	Based on system model of strawberry from Moberg et al. (2019).	1.96e+07	Eidstedt, M., pers. comm. (2018)
Raspberries, fresh	Based on system model of raspberry from Moberg et al. (2019).	1.21972e+06	Eidstedt, M., pers. comm. (2018)
Other berries, fresh	Average of data of strawberries and raspberries.	4.48027e+06	SBA (2019a)
Strawberries, raspberries, black currant, blueberries, lingonberries and other berries, chilled	Average of data of strawberries and raspberries.	1.268e+07	SBA (2019a)
Raisins, figs, dates and other dried fruits	Based on data of grapes with conversion factor to raisins of 3.1 (Swedish National Food Agency, n.d.). Assumed to have the same market shares as grapes.	1.262e+07	SBA (2019a)
Fruits and berries, prepared in canns or in other packaging	Average of data of fruits (oranges, lemons, grapes, apples, pears, peaches, bananas, melons and kiwi) and berries (strawberries and raspberries).	31320000	SBA (2019a)
Jam, marmalades, mashed fruits and jellies, cooked	Based on system model of squash drink from Moberg et al. (2019).	70720000	SBA (2019a)
Soups and clear soups containing vegetables, berries, fruit, fish and meat	Based on soup with 17% content of ingredients (Swedish National Food Agency, n.d.). Average of ingredients of vegetables (carrot, cucumber, onion, leek, cauliflower, cabbages, lettuce and tomato), berries (strawberries and raspberries), fruits (oranges, lemons, grapes, apples, pears, peaches, bananas, melons and kiwi), fish and meat (beef, pork meat, poultry meat, sheep meat, edible intestines, h…	3.526e+07	SBA (2019a)
Squash drink and juice of vegetables, fruits, berries, natural or concentrated (liter)	Based on average of squash drink and juice. System models from Moberg et al. (2019). Ingredients list in Moberg et al. (2019) and environmental impacts of ingredients based on data from this study. Adjusted with density factor from Charrondiere, Haytowitz and Stadlmayr (2012).	205000000	SBA (2019a)
Potato, fresh	Based on system model of potato from Moberg et al. (2019).	434300000	SBA (2019a)
Potato starch	Data for other environmental categories than GHG emissions based on data for potatoes with conversion factor of 4 (Swedish National Food Agency, n.d.).	1200000	SBA (2019a)
Powder for mashed potatoes or turnips	Based on data of potato starch.	3.18e+06	SBA (2019a)
Chilled and deep frozen potato products	Average of fresh potato other prepared potato products.	84560000	SBA (2019a)
Canned potato	Based on data of fresh potato for all environmental categories except for GHG emissions where data is adjusted to other packaging, average of glass and metal packaging with data from Moberg et al. (2019).	2000000	SBA (2019a)
Other prepared potato products (potato crisps)	Based on system model of potato crisps from Moberg et al. (2019). Ingredients list in Moberg et al. (2019) and environmental impacts of ingredients based on data from this study.	18400000	SBA (2019a)
Sugar and sugar-based products	Based on system model of sugar from Moberg et al. (2019).	6.308e+07	SBA (2019a)
Coffee, roasted powder	Based on system model of coffee from Moberg et al. (2019).	7.382e+07	SBA (2019a)
Tea (processed leaves)		2960000	SBA (2019a)
Coffee and tea extractions, e.g. instant coffee	Average of data of coffee and tea based on consumption-levels for each product.	3100000	SBA (2019a)
Cocoa powder, drinking chocolate and chocolate sauces	Average of data of cocoa powder and cocoa drinking powder based on consumption-levels for each product. Based on system models from Moberg et al. (2019). Ingredients list in Moberg et al. (2019) and environmental impacts of ingredients based on data from this study.	2.644e+07	SBA (2019a)
Honey		7400000	SBA (2019a)
Chocolate and confectionary	Based on 46% chocolate and 54% other confectionary (Amcoff, 2012). Environmental data of confectionary was only found for GHG emissions, data for other environmental categories is based on sugar.	1.532e+08	SBA (2019a)
Sauces, including mayonnaise and other prepared products for flavoring	Based on the national food survey of Riksmaten 2010/2011 (Amcoff, 2012). Recipes from cooking books where the largest ingredients are accounted for with system models from Moberg et al. (2019).	143700000	SBA (2019a)
Ice cream including mix containing fat (liter)	Based on system model of dairy-based ice-cream from Moberg et al. (2019). Ingredients list in Moberg et al. (2019) and environmental impacts of ingredients based on data from this study.	89940000	SBA (2019a)
Ice cream not containing fat (liter)	Based on system model of squash drink from Moberg et al. (2019). Ingredients list in Moberg et al. (2019) and environmental impacts of ingredients based on data from this study. Adjusted with density factor from Charrondiere, Haytowitz and Stadlmayr (2012).	5140000	SBA (2019a)
Spices, including mustard	Average of dill and parsley for all environmental categories except cropland use and extinction rate where other spices are accounted for.	16940000	SBA (2019a)
Salt		10100000	SBA (2019a)
Soda, cider etc. (liter)	Based on average of soda and cider. System models from Moberg et al. (2019). Ingredients list in Moberg et al. (2019) and environmental impacts of ingredients based on data from this study.	8.4266e+08	SBA (2019a)
Mineral water and soda water, without sugar or flavoring (liter)	Based on system model of mineral water from Moberg et al. (2019). Ingredients list in Moberg et al. (2019) and environmental impacts of ingredients based on data from this study.	9.558e+07	SBA (2019a)
Light beer, <2.25 % alcohol (liter)	Based on system model of beer, 2.25-3.5% alcohol from Moberg et al. (2019), but with content of 13.5% of barley grain (Swedish National Food Agency, n.d.). Ingredients list in Moberg et al. (2019) and environmental impacts of ingredients based on data from this study.	29780000	SBA (2019a)
Beer, 2.25 - 3.5% alcohol (liter)	Based on system model of beer, 2.25-3.5% alcohol from Moberg et al. (2019). Ingredients list in Moberg et al. (2019) and environmental impacts of ingredients based on data from this study.	1.2888e+08	SBA (2019a)
Beer >3.5 % (liter)	Based on system model of beer, 2.25-3.5% alcohol from Moberg et al. (2019) but with content of 26.5% of barley grain (Swedish National Food Agency, n.d.). Ingredients list in Moberg et al. (2019) and environmental impacts of ingredients based on data from this study.	3.1418e+08	SBA (2019a)
Wine (liter)	Using a conversion factor from grapes to wine by 1.5 based on Notarnicola, Tassielli and Nicoletti (2003).	2.3312e+08	SBA (2019a)
Spirits (liter)	Data for other environmental categories than GHG emissions based on data for grains with conversion factor of 2.5 kg for 1 liter (Garnett, 2007).	2.398e+07	SBA (2019a)
Swedish population, average 2011-2015	Reference
9.61285e+06	SS (2019)

## Sheet: Inventory data
Content of inventory data
Plant-based products
Feed ingredients for aquaculture and animal production
Sheep meat
Potato starch
Honey
Confectionary
Salt
Wine
Spirits
Water consumption, service water for animals
Economic allocation factors for beef and pork meat
Conversion factors for meat
Ingredients for processed products
Number of recognized species included in the analysis
Plant-based products										Characterization factor (CF), potential species loss/m2 (cropland, intense use)						References
Product	Production country	Production system	Share of Swedish market (fraction)	GHG emissions, kg CO2e/kg	Yield, kg/ha	Nitrogen fertilizer application rate, kg N/ha	Nitrogen fixation, kg N/ha	Phosphorus application rate, kg P/ha	Blue freshwater consumption, m3/kg	CF mammals	CF birds	CF amphibians	CF reptiles	CF plants	Factor for losses and waste, including economic allocation of by-products	Production country, production system and market share	GHG emissions	Cropland use	Nitrogen fertilizer application rate	Nitrogen fixation	Phosphorus application rate	Consumptive freshwater use	Extinction rate	Factor for losses and waste, including economic allocation of by-products
Grains
Winter wheat	Sweden	Open-field	0.649983	1.04266	7219.7	140	0	11.6667	0	4.99262e-13	7.6197e-13	6.94103e-14	7.14026e-15	1.53429e-12	1.50798	Moberg et al. (2019)	Moberg et al. (2019)*	Moberg et al. (2019)	Moberg et al. (2019)		SS (2019)	Mekonnen and Hoekstra (2011)	Chaudhary and Brooks (2018)	Moberg et al. (2019)
Spring wheat	Sweden	Open-field	0.132026	1.09068	4859	98.3333	0	10.3333	0	4.99262e-13	7.6197e-13	6.94103e-14	7.14026e-15	1.53429e-12	1.50798	Moberg et al. (2019)	Moberg et al. (2019)*	Moberg et al. (2019)	Moberg et al. (2019)		SS (2019)	Mekonnen and Hoekstra (2011)	Chaudhary and Brooks (2018)	Moberg et al. (2019)
Rye	Sweden	Open-field	0.114914	0.944403	6475.8	97.6667	0	10.6667	0	4.99262e-13	7.6197e-13	6.94103e-14	7.14026e-15	1.53429e-12	1.50798	Moberg et al. (2019)	Moberg et al. (2019)*	Moberg et al. (2019)	Moberg et al. (2019)		SS (2019)	Mekonnen and Hoekstra (2011)	Chaudhary and Brooks (2018)	Moberg et al. (2019)
Winter barley	Sweden	Open-field	0.00227371	0.983444	6355.4	98.6667	0	7.5	0	4.99262e-13	7.6197e-13	6.94103e-14	7.14026e-15	1.53429e-12	1.50798	Moberg et al. (2019)	Moberg et al. (2019)*	Moberg et al. (2019)	Moberg et al. (2019)		SS (2019)	Mekonnen and Hoekstra (2011)	Chaudhary and Brooks (2018)	Moberg et al. (2019)
Spring barley	Sweden	Open-field	0.0492653	0.996308	5117	76.6667	0	8.33333	0	4.99262e-13	7.6197e-13	6.94103e-14	7.14026e-15	1.53429e-12	1.50798	Moberg et al. (2019)	Moberg et al. (2019)*	Moberg et al. (2019)	Moberg et al. (2019)		SS (2019)	Mekonnen and Hoekstra (2011)	Chaudhary and Brooks (2018)	Moberg et al. (2019)
Oats	Sweden	Open-field	0.051539	1.0088	4495.65	69	0	8.66667	0.000328649	4.99262e-13	7.6197e-13	6.94103e-14	7.14026e-15	1.53429e-12	1.50798	Moberg et al. (2019)	Moberg et al. (2019)*	Moberg et al. (2019)	Moberg et al. (2019)		SS (2019)	Mekonnen and Hoekstra (2011)	Chaudhary and Brooks (2018)	Moberg et al. (2019)
Rice
	Thailand	Open-field	0.19	3.09959	3121	69	33	29.5334	0.375532	1.59957e-11	1.41689e-11	1.9994e-11	1.20059e-11	1.33789e-10	1.90834	Moberg et al. (2019)	Moberg et al. (2019)*	Moberg et al. (2019)	Moberg et al. (2019)	Lassaletta et al. (2014)	Average of data from Blengini & Busto (2009) and Fusi et al. (2014).	Mekonnen and Hoekstra (2011)	Chaudhary and Brooks (2018)	Moberg et al. (2019)
	Italy	Open-field	0.14	5.19049	6452	91.223	33	32.8239	0.442	6.21666e-12	1.58946e-12	1.33279e-11	3.23449e-12	3.89715e-10	1.99218	Moberg et al. (2019)	Moberg et al. (2019)*	Moberg et al. (2019)	Moberg et al. (2019)	Lassaletta et al. (2014)	Ecoinvent version 3.5 "Rice production, RoW" (Ecoinvent centre, 2018).	Mekonnen and Hoekstra (2011)	Chaudhary and Brooks (2018)	Moberg et al. (2019)
	Rest of the world	Open-field	0.67	3.37907	4535	100.8	33	29.5334	0.34078	1.11062e-11	7.87916e-12	1.66609e-11	7.62019e-12	2.61752e-10	1.97483	Moberg et al. (2019)	Moberg et al. (2019)*	Moberg et al. (2019)	Moberg et al. (2019)	Lassaletta et al. (2014)	Ecoinvent version 3.5 "Rice production, RoW" (Ecoinvent centre, 2018).	Mekonnen and Hoekstra (2011)	Chaudhary and Brooks (2018)	Moberg et al. (2019)
Potato
	Sweden	Open-field	0.76	0.317578	30456	103.667	0	37.6667	0.00905267	4.99262e-13	7.6197e-13	6.94103e-14	7.14026e-15	1.53429e-12	1.39013	Moberg et al. (2019)	Moberg et al. (2019)*	Moberg et al. (2019)	Moberg et al. (2019)		SS (2019)	Mekonnen and Hoekstra (2011)	Chaudhary and Brooks (2018)	Moberg et al. (2019)
	Denmark	Open-field	0.15	0.383228	41442	159.247	0	179.332	0.016	7.61283e-13	9.91146e-13	4.44588e-13	5.49635e-14	1.35691e-11	1.39013	Moberg et al. (2019)	Moberg et al. (2019)*	Moberg et al. (2019)	Moberg et al. (2019)		Ecoinvent version 3.5 "Potato production, RoW" (Ecoinvent centre, 2018).	Mekonnen and Hoekstra (2011)	Chaudhary and Brooks (2018)	Moberg et al. (2019)
	Rest of Europe	Open-field	0.09	0.653262	20741	125	0	89.7525	0.0125263	6.30272e-13	8.76558e-13	2.56999e-13	3.10519e-14	7.55171e-12	1.39013	Moberg et al. (2019)	Moberg et al. (2019)*	Moberg et al. (2019)	Moberg et al. (2019)		Ecoinvent version 3.5 "Potato production, RoW" (Ecoinvent centre, 2018).	Mekonnen and Hoekstra (2011)	Chaudhary and Brooks (2018)	Moberg et al. (2019)
Rapeseed and rapeseed oil
Winter rapeseed	Sweden	Open-field	0.739217	1.97132	3783	152.667	0	10.6667	0	4.99262e-13	7.6197e-13	6.94103e-14	7.14026e-15	1.53429e-12	1.89168	Moberg et al. (2019)	Moberg et al. (2019)*	Moberg et al. (2019)	Moberg et al. (2019)		SS (2019)	Mekonnen and Hoekstra (2011)	Chaudhary and Brooks (2018)	Moberg et al. (2019)
Spring rapeseed	Sweden	Open-field	0.231316	2.24457	2090	105.667	0	13.6667	0	4.99262e-13	7.6197e-13	6.94103e-14	7.14026e-15	1.53429e-12	1.89168	Moberg et al. (2019)	Moberg et al. (2019)*	Moberg et al. (2019)	Moberg et al. (2019)		SS (2019)	Mekonnen and Hoekstra (2011)	Chaudhary and Brooks (2018)	Moberg et al. (2019)
Rapeseed	Rest of Europe	Open-field	0.0294675	2.43284	2826.56	134.244	0	57.1227	0	4.99262e-13	7.6197e-13	6.94103e-14	7.14026e-15	1.53429e-12	1.89168	Moberg et al. (2019)	Moberg et al. (2019)*	Moberg et al. (2019)	Moberg et al. (2019)		Ecoinvent version 3.5 "Rape seed production, RoW" (Ecoinvent centre, 2018).	Mekonnen and Hoekstra (2011)	Chaudhary and Brooks (2018)	Moberg et al. (2019)
Sugar beet
	Sweden	Open-field	1	1.44261	64140	97.6667	0	16	0.0032611	4.99262e-13	7.6197e-13	6.94103e-14	7.14026e-15	1.53429e-12	10.3267	Moberg et al. (2019)	Moberg et al. (2019)*	Moberg et al. (2019)	Moberg et al. (2019)		SS (2019)	Mekonnen and Hoekstra (2011)	Chaudhary and Brooks (2018)	Moberg et al. (2019)
Tomato
	Sweden	Greenhouse	0.14	0.925891	386377	1152.35	0	318.592	0.002	4.99262e-13	7.6197e-13	6.94103e-14	7.14026e-15	1.53429e-12	1.19346	Moberg et al. (2019)	Moberg et al. (2019)*	Moberg et al. (2019)	Moberg et al. (2019)		Röös and Karlsson (2013)	Mekonnen and Hoekstra (2011)	Chaudhary and Brooks (2018)	Moberg et al. (2019)
	The Netherlands	Greenhouse	0.56	1.96773	486028	1031	0	0	0	1.55658e-12	1.06189e-12	8.88417e-13	1.79103e-13	5.29821e-12	1.19346	Moberg et al. (2019)	Moberg et al. (2019)*	Moberg et al. (2019)	Moberg et al. (2019)		Ecoinvent version 3.5 "Tomato production in heated greenhouse" (Ecoinvent centre, 2018)	Mekonnen and Hoekstra (2011)	Chaudhary and Brooks (2018)	Moberg et al. (2019)
	Spain	Greenhouse	0.11	0.445947	98025	352	0	151.493	0.023	3.77382e-12	2.58194e-12	3.87264e-12	7.38592e-12	6.70254e-10	1.19346	Moberg et al. (2019)	Moberg et al. (2019)*	Moberg et al. (2019)	Moberg et al. (2019)		Mapama (n.d)	Mekonnen and Hoekstra (2011)	Chaudhary and Brooks (2018)	Moberg et al. (2019)
		Open-field	0.07	0.505789	82235	302	0	106.22	0.023	3.77382e-12	2.58194e-12	3.87264e-12	7.38592e-12	6.70254e-10	1.19346	Moberg et al. (2019)	Moberg et al. (2019)*	Moberg et al. (2019)	Moberg et al. (2019)		Mapama (n.d)	Mekonnen and Hoekstra (2011)	Chaudhary and Brooks (2018)	Moberg et al. (2019)
	Rest of Europe	Greenhouse	0.06	1.26103	42797	207	0	131.244	0.012	2.40087e-12	1.74693e-12	2.17578e-12	3.73952e-12	3.36835e-10	1.19346	Moberg et al. (2019)	Moberg et al. (2019)*	Moberg et al. (2019)	Moberg et al. (2019)		Ecoinvent version 3.5 "Tomato production in unheated greenhouse, RoW" (Ecoinvent centre, 2018).	Mekonnen and Hoekstra (2011)	Chaudhary and Brooks (2018)	Moberg et al. (2019)
		Open-field	0.06	0.482371	42797	73	0	0	0.012	2.40087e-12	1.74693e-12	2.17578e-12	3.73952e-12	3.36835e-10	1.19346	Moberg et al. (2019)	Moberg et al. (2019)*	Moberg et al. (2019)	Moberg et al. (2019)		Ecoinvent version 3.5 "Tomato production, fresh grade, open-field, RoW" (Ecoinvent centre, 2018).	Mekonnen and Hoekstra (2011)	Chaudhary and Brooks (2018)	Moberg et al. (2019)
Cucumber
	Sweden	Greenhouse	0.35	0.687717	439826	1451.43	0	703.722	0.002	4.99262e-13	7.6197e-13	6.94103e-14	7.14026e-15	1.53429e-12	1.19346	Moberg et al. (2019)	Moberg et al. (2019)*	Moberg et al. (2019)	Moberg et al. (2019)		Davis et al. (2011)	Mekonnen and Hoekstra (2011)	Chaudhary and Brooks (2018)	Moberg et al. (2019)
		Open-field	0.12	0.254569	58800	140	0	36.1846	0.002	4.99262e-13	7.6197e-13	6.94103e-14	7.14026e-15	1.53429e-12	1.19346	Moberg et al. (2019)	Moberg et al. (2019)*	Moberg et al. (2019)	Moberg et al. (2019)		Marmolin and Björkholm (n.d.)	Mekonnen and Hoekstra (2011)	Chaudhary and Brooks (2018)	Moberg et al. (2019)
	The Netherlands	Greenhouse	0.17	1.48821	679276	815	0	203.783	0	1.55658e-12	1.06189e-12	8.88417e-13	1.79103e-13	5.29821e-12	1.19346	Moberg et al. (2019)	Moberg et al. (2019)*	Moberg et al. (2019)	Moberg et al. (2019)		Ecoinvent version 3.5 "Cucumber production, global" (Ecoinvent centre, 2018)	Mekonnen and Hoekstra (2011)	Chaudhary and Brooks (2018)	Moberg et al. (2019)
	Spain	Greenhouse	0.26	0.439138	91618	286	0	160.332	0.032	3.77382e-12	2.58194e-12	3.87264e-12	7.38592e-12	6.70254e-10	1.19346	Moberg et al. (2019)	Moberg et al. (2019)*	Moberg et al. (2019)	Moberg et al. (2019)		Mapama (n.d.)	Mekonnen and Hoekstra (2011)	Chaudhary and Brooks (2018)	Moberg et al. (2019)
		Open-field	0.05	0.505182	85703	314	0	1285.54	0.032	3.77382e-12	2.58194e-12	3.87264e-12	7.38592e-12	6.70254e-10	1.19346	Moberg et al. (2019)	Moberg et al. (2019)*	Moberg et al. (2019)	Moberg et al. (2019)		Mapama (n.d.)	Mekonnen and Hoekstra (2011)	Chaudhary and Brooks (2018)	Moberg et al. (2019)
	Rest of Europe	Open-field	0.05	0.494879	30104	90.9858	0	660.865	0.0136	2.02055e-12	1.54994e-12	1.75451e-12	2.99304e-12	2.69775e-10	1.19346	Moberg et al. (2019)	Moberg et al. (2019)*	Moberg et al. (2019)	Moberg et al. (2019)		Average of other countries.	Mekonnen and Hoekstra (2011)	Chaudhary and Brooks (2018)	Moberg et al. (2019)
Iceberg lettuce
	Sweden	Open-field	0.82	0.280035	24916	104	0	20.7633	0.00151675	4.99262e-13	7.6197e-13	6.94103e-14	7.14026e-15	1.53429e-12	1.19346	Moberg et al. (2019)	Moberg et al. (2019)*	Moberg et al. (2019)	Moberg et al. (2019)		Marmolin & Björkholm (n.d.)	Mekonnen and Hoekstra (2011), Data for "Cabbage lettuce (head lettuce) fresh or chilled".	Chaudhary and Brooks (2018)	Moberg et al. (2019)
	Spain	Open-field	0.12	0.516592	26640	99	0	30.4457	0.073	3.77382e-12	2.58194e-12	3.87264e-12	7.38592e-12	6.70254e-10	1.19346	Moberg et al. (2019)	Moberg et al. (2019)*	Moberg et al. (2019)	Moberg et al. (2019)		Mapama (n.d)	Mekonnen and Hoekstra (2011), Data for "Cabbage lettuce (head lettuce) fresh or chilled".	Chaudhary and Brooks (2018)	Moberg et al. (2019)
	Rest of Europe	Open-field	0.06	0.517131	23483	83.1309	0	10.4265	0.0372584	2.13654e-12	1.67196e-12	1.97103e-12	3.69653e-12	3.35894e-10	1.19346	Moberg et al. (2019)	Moberg et al. (2019)*	Moberg et al. (2019)	Moberg et al. (2019)		Ecoinvent version 3.5 "Iceberg lettuce production, GLO" (Ecoinvent centre, 2018).	Mekonnen and Hoekstra (2011), Data for "Cabbage lettuce (head lettuce) fresh or chilled".	Chaudhary and Brooks (2018)	Moberg et al. (2019)
Carrot
	Sweden	Open-field	0.93	0.274593	59492	83	0	29.746	1.96019e-05	4.99262e-13	7.6197e-13	6.94103e-14	7.14026e-15	1.53429e-12	1.19346	Moberg et al. (2019)	Moberg et al. (2019)*	Moberg et al. (2019)	Moberg et al. (2019)		Marmolin & Björkholm (n.d.)	Mekonnen and Hoekstra (2011)	Chaudhary and Brooks (2018)	Moberg et al. (2019)
	Rest of Europe	Open-field	0.07	0.614274	32525	121	0	37.1714	1.96019e-05	4.99262e-13	7.6197e-13	6.94103e-14	7.14026e-15	1.53429e-12	1.19346	Moberg et al. (2019)	Moberg et al. (2019)*	Moberg et al. (2019)	Moberg et al. (2019)		Ecoinvent version 3.5 "Carrot production, RoW" (Ecoinvent centre, 2018)	Mekonnen and Hoekstra (2011)	Chaudhary and Brooks (2018)	Moberg et al. (2019)
Onion
	Sweden	Open-field	0.65	0.306799	47000	144	0	44.2353	0.0292014	4.99262e-13	7.6197e-13	6.94103e-14	7.14026e-15	1.53429e-12	1.19346	Moberg et al. (2019)	Moberg et al. (2019)*	Moberg et al. (2019)	Moberg et al. (2019)		Marmolin & Björkholm (n.d.)	Mekonnen and Hoekstra (2011). Data for "Onions, provisionally preserved but not suitable for immediate consumption".	Chaudhary and Brooks (2018)	Moberg et al. (2019)
	The Netherlands	Open-field	0.21	0.45783	48196	165	0	79.988	0.0045096	1.55658e-12	1.06189e-12	8.88417e-13	1.79103e-13	5.29821e-12	1.19346	Moberg et al. (2019)	Moberg et al. (2019)*	Moberg et al. (2019)	Moberg et al. (2019)		Spruijt & van der Voort (2015)	Mekonnen and Hoekstra (2011). Data for "Onions, provisionally preserved but not suitable for immediate consumption".	Chaudhary and Brooks (2018)	Moberg et al. (2019)
	Rest of Europe	Open-field	0.14	0.614634	17835	60	0	71.34	0.0168555	1.02792e-12	9.11928e-13	4.78913e-13	9.31218e-14	3.41625e-12	1.19346	Moberg et al. (2019)	Moberg et al. (2019)*	Moberg et al. (2019)	Moberg et al. (2019)		Ecoinvent version 3.5 "Onion production, RoW" (Ecoinvent centre, 2018)	Mekonnen and Hoekstra (2011). Data for "Onions, provisionally preserved but not suitable for immediate consumption".	Chaudhary and Brooks (2018)	Moberg et al. (2019)
Leek
	Sweden	Open-field	0.35	0.321813	29273	220	0	43.9095	0.0292014	4.99262e-13	7.6197e-13	6.94103e-14	7.14026e-15	1.53429e-12	1.19346	Moberg et al. (2019)	Moberg et al. (2019)*	Moberg et al. (2019)	Moberg et al. (2019)		Marmolin & Björkholm (n.d.)	Mekonnen and Hoekstra (2011). Assumed to be the same as for onions.	Chaudhary and Brooks (2018)	Moberg et al. (2019)
	The Netherlands	Open-field	0.54	0.4112	35472	168	0	0	0.0045096	1.55658e-12	1.06189e-12	8.88417e-13	1.79103e-13	5.29821e-12	1.19346	Moberg et al. (2019)	Moberg et al. (2019)*	Moberg et al. (2019)	Moberg et al. (2019)		Spruijt & van der Voort (2015)	Mekonnen and Hoekstra (2011). Assumed to be the same as for onions.	Chaudhary and Brooks (2018)	Moberg et al. (2019)
	Rest of Europe	Open-field	0.11	0.553447	28948	177	0	21.9548	0.0168555	1.02792e-12	9.11928e-13	4.78913e-13	9.31218e-14	3.41625e-12	1.19346	Moberg et al. (2019)	Moberg et al. (2019)*	Moberg et al. (2019)	Moberg et al. (2019)		Average of other countries.	Mekonnen and Hoekstra (2011). Assumed to be the same as for onions.	Chaudhary and Brooks (2018)	Moberg et al. (2019)
White cabbage
	Sweden	Open-field	0.43	0.286507	44100	200	0	15.75	0.00973653	4.99262e-13	7.6197e-13	6.94103e-14	7.14026e-15	1.53429e-12	1.19346	Moberg et al. (2019)	Moberg et al. (2019)*	Moberg et al. (2019)	Moberg et al. (2019)		Marmolin & Björkholm (n.d.)	Mekonnen and Hoekstra (2011)	Chaudhary and Brooks (2018)	Moberg et al. (2019)
	Germany	Open-field	0.51	0.400344	56752	213.955	0	45.864	0.01	1.58448e-12	9.11288e-13	6.43462e-13	1.40077e-13	8.46288e-12	1.19346	Moberg et al. (2019)	Moberg et al. (2019)*	Moberg et al. (2019)	Moberg et al. (2019)		Ecoinvent version 3.5 "White cabbage production, GLO" (Ecoinvent centre, 2018)	Mekonnen and Hoekstra (2011)	Chaudhary and Brooks (2018)	Moberg et al. (2019)
	Rest of Europe	Open-field	0.06	0.527315	29144	109.873	0	30.3098	0.00986827	1.04187e-12	8.36629e-13	3.56436e-13	7.36089e-14	4.99858e-12	1.19346	Moberg et al. (2019)	Moberg et al. (2019)*	Moberg et al. (2019)	Moberg et al. (2019)		Ecoinvent version 3.5 "White cabbage production, GLO" (Ecoinvent centre, 2018)	Mekonnen and Hoekstra (2011)	Chaudhary and Brooks (2018)	Moberg et al. (2019)
Cauliflower
	Sweden	Open-field	0.42	0.416874	17820	220	0	21.384	0.00973653	4.99262e-13	7.6197e-13	6.94103e-14	7.14026e-15	1.53429e-12	1.19346	Moberg et al. (2019)	Moberg et al. (2019)*	Moberg et al. (2019)	Moberg et al. (2019)		Marmolin & Björkholm (n.d.)	Mekonnen and Hoekstra (2011)	Chaudhary and Brooks (2018)	Moberg et al. (2019)
	Spain	Open-field	0.27	0.631019	17353	162	0	46.2747	0.104	3.77382e-12	2.58194e-12	3.87264e-12	7.38592e-12	6.70254e-10	1.19346	Moberg et al. (2019)	Moberg et al. (2019)*	Moberg et al. (2019)	Moberg et al. (2019)		Mapama (n.d)	Mekonnen and Hoekstra (2011)	Chaudhary and Brooks (2018)	Moberg et al. (2019)
	France	Open-field	0.14	0.534252	17578	190	0	19.16	0.03	2.0321e-12	1.25706e-12	2.72146e-12	1.24427e-12	1.09804e-10	1.19346	Moberg et al. (2019)	Moberg et al. (2019)*	Moberg et al. (2019)	Moberg et al. (2019)		Ecoinvent version 3.5 "Cauliflower production, GLO" (Ecoinvent centre, 2018)	Mekonnen and Hoekstra (2011)	Chaudhary and Brooks (2018)	Moberg et al. (2019)
	Rest of Europe	Open-field	0.17	0.6538	17400	188	0	18.966	0.0479122	2.10173e-12	1.53366e-12	2.22117e-12	2.87911e-12	2.60531e-10	1.19346	Moberg et al. (2019)	Moberg et al. (2019)*	Moberg et al. (2019)	Moberg et al. (2019)		Ecoinvent version 3.5 "Cauliflower production, GLO" (Ecoinvent centre, 2018)	Mekonnen and Hoekstra (2011)	Chaudhary and Brooks (2018)	Moberg et al. (2019)
Broccoli
	Sweden	Open-field	0.66	0.566978	8428.72	150	0	22.9448	0.00973653	4.99262e-13	7.6197e-13	6.94103e-14	7.14026e-15	1.53429e-12	1.19346	Moberg et al. (2019)	Moberg et al. (2019)*	Moberg et al. (2019)	Moberg et al. (2019)		Marmolin & Björkholm (n.d.)	Mekonnen and Hoekstra (2011)	Chaudhary and Brooks (2018)	Moberg et al. (2019)
	Spain	Open-field	0.14	0.785806	17353	298	0	43.3477	0.104	3.77382e-12	2.58194e-12	3.87264e-12	7.38592e-12	6.70254e-10	1.19346	Moberg et al. (2019)	Moberg et al. (2019)*	Moberg et al. (2019)	Moberg et al. (2019)		Mapama (n.d)	Mekonnen and Hoekstra (2011)	Chaudhary and Brooks (2018)	Moberg et al. (2019)
	Rest of Europe	Open-field	0.2	0.718281	17400	209	0	18.3942	0.0568683	2.13654e-12	1.67196e-12	1.97103e-12	3.69653e-12	3.35894e-10	1.19346	Moberg et al. (2019)	Moberg et al. (2019)*	Moberg et al. (2019)	Moberg et al. (2019)		Ecoinvent version 3.5 "Broccoli production, GLO" (Ecoinvent centre, 2018)	Mekonnen and Hoekstra (2011)	Chaudhary and Brooks (2018)	Moberg et al. (2019)
Apple
	Sweden	Open-field	0.21	0.201391	17137	45	0	6.8548	0	4.99262e-13	7.6197e-13	6.94103e-14	7.14026e-15	1.53429e-12	1.19346	Moberg et al. (2019)	Moberg et al. (2019)*	Moberg et al. (2019)	Moberg et al. (2019)		SBA (2004)	Mekonnen and Hoekstra (2011)	Chaudhary and Brooks (2018)	Moberg et al. (2019)
	Italy	Open-field	0.3	0.374699	41029	51	0	35.9004	0.042	6.21666e-12	1.58946e-12	1.33279e-11	3.23449e-12	3.89715e-10	1.19346	Moberg et al. (2019)	Moberg et al. (2019)*	Moberg et al. (2019)	Moberg et al. (2019)		Ecoinvent version 3.5 "Apple production, IT" (Ecoinvent centre, 2018)	Mekonnen and Hoekstra (2011)	Chaudhary and Brooks (2018)	Moberg et al. (2019)
	Rest of Europe	Open-field	0.49	0.438716	15908	28	0	18.9573	0.021	3.35796e-12	1.17571e-12	6.69865e-12	1.62082e-12	1.95625e-10	1.19346	Moberg et al. (2019)	Moberg et al. (2019)*	Moberg et al. (2019)	Moberg et al. (2019)		Ecoinvent version 3.5 "Apple production, RoW" (Ecoinvent centre, 2018)	Mekonnen and Hoekstra (2011)	Chaudhary and Brooks (2018)	Moberg et al. (2019)
Banana
	Costa Rica	Open-field	0.22	0.614992	51039	76	0	0.981519	0.063	7.63436e-11	1.44702e-10	4.83773e-10	5.75624e-12	1.89518e-09	1.54321	Moberg et al. (2019)	Moberg et al. (2019)*	Moberg et al. (2019)	Moberg et al. (2019)		Ecoinvent version 3.5 "Banana production, CR" (Ecoinvent centre, 2018)	Mekonnen and Hoekstra (2011)	Chaudhary and Brooks (2018)	Moberg et al. (2019)
	Ecuador	Open-field	0.15	0.744126	35203	283	0	3.20027	0.05	5.42135e-11	1.29712e-10	3.42936e-10	1.08991e-11	1.46629e-09	1.54321	Moberg et al. (2019)	Moberg et al. (2019)*	Moberg et al. (2019)	Moberg et al. (2019)		Ecoinvent version 3.5 "Banana production, EC" (Ecoinvent centre, 2018)	Mekonnen and Hoekstra (2011)	Chaudhary and Brooks (2018)	Moberg et al. (2019)
	Panama	Open-field	0.15	0.617137	37174	60	0	0	0.0249094	6.55501e-11	1.42239e-10	3.9253e-10	6.26592e-12	2.38855e-09	1.54321	Moberg et al. (2019)	Moberg et al. (2019)*	Moberg et al. (2019)	Moberg et al. (2019)		Ecoinvent version 3.5 "Banana production, RoW" (Ecoinvent centre, 2018)	Mekonnen and Hoekstra (2011)	Chaudhary and Brooks (2018)	Moberg et al. (2019)
	Rest of the world	Open-field	0.48	0.694014	20544	33	0	0	0.0459698	6.53691e-11	1.38885e-10	4.06413e-10	7.64041e-12	1.91667e-09	1.37219	Moberg et al. (2019)	Moberg et al. (2019)*	Moberg et al. (2019)	Moberg et al. (2019)		Ecoinvent version 3.5 "Banana production, RoW" (Ecoinvent centre, 2018)	Mekonnen and Hoekstra (2011)	Chaudhary and Brooks (2018)	Moberg et al. (2019)
Melon
	Sweden	Greenhouse	0.38	3.9911	57362	204	0	70.5553	0.0309631	4.99262e-13	7.6197e-13	6.94103e-14	7.14026e-15	1.53429e-12	1.19346	Moberg et al. (2019)	Moberg et al. (2019)*	Moberg et al. (2019)	Moberg et al. (2019)		Ecoinvent version 3.5 "Melon production, GLO" (Ecoinvent centre, 2018)	No data found for Sweden, average of other production countries is used.	Chaudhary and Brooks (2018)	Moberg et al. (2019)
	Spain	Open-field	0.34	0.414497	31379	135	0	49.3099	0.061	3.77382e-12	2.58194e-12	3.87264e-12	7.38592e-12	6.70254e-10	1.19346	Moberg et al. (2019)	Moberg et al. (2019)*	Moberg et al. (2019)	Moberg et al. (2019)		Ecoinvent version 3.5 "Melon production, GLO" (Ecoinvent centre, 2018)	Mekonnen and Hoekstra (2011)	Chaudhary and Brooks (2018)	Moberg et al. (2019)
	The Netherlands	Open-field	0.16	0.286252	29537	105	0	36.3305	0.000926252	1.55658e-12	1.06189e-12	8.88417e-13	1.79103e-13	5.29821e-12	1.19346	Moberg et al. (2019)	Moberg et al. (2019)*	Moberg et al. (2019)	Moberg et al. (2019)		Ecoinvent version 3.5 "Melon production, GLO" (Ecoinvent centre, 2018)	Mekonnen and Hoekstra (2011)	Chaudhary and Brooks (2018)	Moberg et al. (2019)
	Rest of Europe	Open-field	0.12	0.420389	20335	72	0	25.012	0.0309631	1.94322e-12	1.4686e-12	1.61016e-12	2.52405e-12	2.25696e-10	1.19346	Moberg et al. (2019)	Moberg et al. (2019)*	Moberg et al. (2019)	Moberg et al. (2019)		Ecoinvent version 3.5 "Melon production, GLO" (Ecoinvent centre, 2018)	Mekonnen and Hoekstra (2011)	Chaudhary and Brooks (2018)	Moberg et al. (2019)
Pear
	Sweden	Open-field	0.0558773	0.225613	14510	48	0	6.5295	0	4.99262e-13	7.6197e-13	6.94103e-14	7.14026e-15	1.53429e-12	1.19346	Moberg et al. (2019)	Moberg et al. (2019)*	Moberg et al. (2019)	Moberg et al. (2019)		SBA (2004)	Mekonnen and Hoekstra (2011)	Chaudhary and Brooks (2018)	Moberg et al. (2019)
	Belgium	Open-field	0.230618	0.258057	34389	26	0	0	0.001	1.585e-12	1.00275e-12	8.25021e-13	1.74828e-13	5.53124e-12	1.19346	Moberg et al. (2019)	Moberg et al. (2019)*	Moberg et al. (2019)	Moberg et al. (2019)		Ecoinvent version 3.5 "Pear production, BE" (Ecoinvent centre, 2018).	Mekonnen and Hoekstra (2011)	Chaudhary and Brooks (2018)	Moberg et al. (2019)
	The Netherlands	Open-field	0.486276	0.40344	36080	389	0	103.827	0.002	1.55658e-12	1.06189e-12	8.88417e-13	1.79103e-13	5.29821e-12	1.19346	Moberg et al. (2019)	Moberg et al. (2019)*	Moberg et al. (2019)	Moberg et al. (2019)		Ecoinvent version 3.5 "Pear production, RoW" (Ecoinvent centre, 2018)	Mekonnen and Hoekstra (2011)	Chaudhary and Brooks (2018)	Moberg et al. (2019)
	Rest of Europe	Open-field	0.227229	0.57648	15627	169	0	44.9698	0.001	1.21361e-12	9.42201e-13	5.94283e-13	1.20357e-13	4.12125e-12	1.19346	Moberg et al. (2019)	Moberg et al. (2019)*	Moberg et al. (2019)	Moberg et al. (2019)		Ecoinvent version 3.5 "Pear production, RoW" (Ecoinvent centre, 2018)	Mekonnen and Hoekstra (2011)	Chaudhary and Brooks (2018)	Moberg et al. (2019)
Lemon
	Spain	Open-field	0.43	0.526262	21546	260	0	75	0.159	3.77382e-12	2.58194e-12	3.87264e-12	7.38592e-12	6.70254e-10	1.19346	Moberg et al. (2019)	Moberg et al. (2019)*	Moberg et al. (2019)	Moberg et al. (2019)		Mapama (n.d.)	Mekonnen and Hoekstra (2011)	Chaudhary and Brooks (2018)	Moberg et al. (2019)
	Rest of Europe	Open-field	0.57	0.403648	15410	37	0	0	0.159	3.77382e-12	2.58194e-12	3.87264e-12	7.38592e-12	6.70254e-10	1.19346	Moberg et al. (2019)	Moberg et al. (2019)*	Moberg et al. (2019)	Moberg et al. (2019)		Ecoinvent version 3.5 "Lemon production, RoW" (Ecoinvent centre, 2018)	Mekonnen and Hoekstra (2011)	Chaudhary and Brooks (2018)	Moberg et al. (2019)
Strawberry
	Sweden	Open-field	0.69	0.4129	6624	32.9926	0	13.7902	0.099	4.99262e-13	7.6197e-13	6.94103e-14	7.14026e-15	1.53429e-12	1.19346	Moberg et al. (2019)	Moberg et al. (2019)*	Moberg et al. (2019)	Moberg et al. (2019)		Ecoinvent version 3.5 "Strawberry production, open field, macro tunnel, RoW" (Ecoinvent centre, 2018)	Mekonnen and Hoekstra (2011)	Chaudhary and Brooks (2018)	Moberg et al. (2019)
	Belgium	Open-field	0.14	0.412743	23765	83	0	49.4752	0.012	1.585e-12	1.00275e-12	8.25021e-13	1.74828e-13	5.53124e-12	1.19346	Moberg et al. (2019)	Moberg et al. (2019)*	Moberg et al. (2019)	Moberg et al. (2019)		Ecoinvent version 3.5 "Strawberry production, open field, macro tunnel, RoW" (Ecoinvent centre, 2018)	Mekonnen and Hoekstra (2011)	Chaudhary and Brooks (2018)	Moberg et al. (2019)
	Rest of Europe	Greenhouse	0.085	4.02408	87836.7	421.618	0	158.106	0.0555	1.04213e-12	8.82359e-13	4.47216e-13	9.0984e-14	3.53277e-12	1.19346	Moberg et al. (2019)	Moberg et al. (2019)*	Moberg et al. (2019)	Moberg et al. (2019)		Ecoinvent version 3.5 "Strawberry production, in heated greenhouse, RoW" (Ecoinvent centre, 2018)	Mekonnen and Hoekstra (2011)	Chaudhary and Brooks (2018)	Moberg et al. (2019)
		Open-field	0.085	0.596763	9312	33	0	19.3862	0.0555	1.04213e-12	8.82359e-13	4.47216e-13	9.0984e-14	3.53277e-12	1.19346	Moberg et al. (2019)	Moberg et al. (2019)*	Moberg et al. (2019)	Moberg et al. (2019)		Ecoinvent version 3.5 "Strawberry production, open field, macro tunnel, RoW" (Ecoinvent centre, 2018)	Mekonnen and Hoekstra (2011)	Chaudhary and Brooks (2018)	Moberg et al. (2019)
Raspberry
	Sweden	Open-field	0.44	0.876267	3343	100	0	12.5	0	4.99262e-13	7.6197e-13	6.94103e-14	7.14026e-15	1.53429e-12	1.19346	Moberg et al. (2019)	Moberg et al. (2019)*	Moberg et al. (2019)	Moberg et al. (2019)		Nilsson (2011)	Mekonnen and Hoekstra (2011)	Chaudhary and Brooks (2018)	Moberg et al. (2019)
	Belgium	Open-field	0.15	0.528737	11690	100	0	12.5	0.005	1.585e-12	1.00275e-12	8.25021e-13	1.74828e-13	5.53124e-12	1.19346	Moberg et al. (2019)	Moberg et al. (2019)*	Moberg et al. (2019)	Moberg et al. (2019)		Nilsson (2011)	Mekonnen and Hoekstra (2011)	Chaudhary and Brooks (2018)	Moberg et al. (2019)
	The Netherlands	Open-field	0.25	0.614627	8272	100	0	12.5	0.015	1.55658e-12	1.06189e-12	8.88417e-13	1.79103e-13	5.29821e-12	1.19346	Moberg et al. (2019)	Moberg et al. (2019)*	Moberg et al. (2019)	Moberg et al. (2019)		Nilsson (2011)	Mekonnen and Hoekstra (2011)	Chaudhary and Brooks (2018)	Moberg et al. (2019)
	Rest of Europe	Open-field	0.16	0.880982	5513	100	0	12.5	0.00666667	1.21361e-12	9.42201e-13	5.94283e-13	1.20357e-13	4.12125e-12	1.19346	Moberg et al. (2019)	Moberg et al. (2019)*	Moberg et al. (2019)	Moberg et al. (2019)		Nilsson (2011)	Mekonnen and Hoekstra (2011)	Chaudhary and Brooks (2018)	Moberg et al. (2019)
Kiwifruit
	Italy	Open-field	0.49	0.45002	17796	79.6834	0	132.758	0.085	6.21666e-12	1.58946e-12	1.33279e-11	3.23449e-12	3.89715e-10	1.19346	Moberg et al. (2019)	Moberg et al. (2019)*	Moberg et al. (2019)	Moberg et al. (2019)		Ecoinvent version 3.5 "Kiwi production, GLO" (Ecoinvent centre, 2018)	Mekonnen and Hoekstra (2011)	Chaudhary and Brooks (2018)	Moberg et al. (2019)
	Rest of the world	Open-field	0.51	0.807893	15757	71	0	117.547	0.168487	6.21666e-12	1.58946e-12	1.33279e-11	3.23449e-12	3.89715e-10	1.37219	Moberg et al. (2019)	Moberg et al. (2019)*	Moberg et al. (2019)	Moberg et al. (2019)		Ecoinvent version 3.5 "Kiwi production, GLO" (Ecoinvent centre, 2018)	Mekonnen and Hoekstra (2011)	Chaudhary and Brooks (2018)	Moberg et al. (2019)
Orange
	Spain	Open-field	0.41	0.52839	21325	260	0	75	0.16	3.77382e-12	2.58194e-12	3.87264e-12	7.38592e-12	6.70254e-10	1.19346	Moberg et al. (2019)	Moberg et al. (2019)*	Moberg et al. (2019)	Moberg et al. (2019)		Mapama (n.d.)	Mekonnen and Hoekstra (2011)	Chaudhary and Brooks (2018)	Moberg et al. (2019)
	Rest of the world	Open-field	0.59	0.867753	18131	181	0	39.2838	0.109521	3.77382e-12	2.58194e-12	3.87264e-12	7.38592e-12	6.70254e-10	1.37219	Moberg et al. (2019)	Moberg et al. (2019)*	Moberg et al. (2019)	Moberg et al. (2019)		Ecoinvent version 3.5 "Orange production, fresh grade, RoW" (Ecoinvent centre, 2018)	Mekonnen and Hoekstra (2011)	Chaudhary and Brooks (2018)	Moberg et al. (2019)
Cocoa
Cocoa	Ivory Coast	Open-field	0.338373	2.81009	532.84	26.077	0	5.2154	0	2.02912e-11	1.28293e-11	2.2698e-11	6.76108e-12	3.93207e-11	3.76475	FAOSTAT (2019)	Moberg et al. (2019)*	Moberg et al. (2019)	Moberg et al. (2019)		Ecoinvent version 3.5 "Cocoa bean production, sun-dried, CI" (Ecoinvent centre, 2018)	Mekonnen and Hoekstra (2011)	Chaudhary and Brooks (2018)	Moberg et al. (2019)
	Ghana	Open-field	0.177999	2.53456	505.8	0	0	59.7663	0	1.54636e-11	9.68059e-12	1.48416e-11	6.08227e-12	2.93237e-11	3.76475	FAOSTAT (2019)	Moberg et al. (2019)*, updated with inventory data of yield levels (FAOSTAT, 2019), nitrogen application (Ecoinvent version 3.5 "Cocoa bean production, sun-dried, GH" from Ecoinvent centre, 2018), impact from transportation (Moberg et al., 2019) and waste and losses along the chain (Moberg et al., 2019).	FAOSTAT (2019)	Ecoinvent version 3.5 "Cocoa bean production, sun-dried, GH" (Ecoinvent centre, 2018)		Ecoinvent version 3.5 "Cocoa bean production, sun-dried, GH" (Ecoinvent centre, 2018)	Mekonnen and Hoekstra (2011)	Chaudhary and Brooks (2018)	Moberg et al. (2019)
	Indonesia	Open-field	0.150563	5.39286	398.74	53.381	0	71.1747	0	5.51227e-11	5.36047e-11	4.53818e-11	1.31128e-11	4.91196e-10	3.76475	FAOSTAT (2019)	Moberg et al. (2019)*, updated with inventory data of yield levels (FAOSTAT, 2019), nitrogen application (Ecoinvent version 3.5 "Cocoa bean production, sun-dried, ID" from Ecoinvent centre, 2018), impact from transportation (Moberg et al., 2019) and waste and losses along the chain (Moberg et al., 2019).	FAOSTAT (2019)	Ecoinvent version 3.5 "Cocoa bean production, sun-dried, ID" (Ecoinvent centre, 2018)		Ecoinvent version 3.5 "Cocoa bean production, sun-dried, ID" (Ecoinvent centre, 2018)	Mekonnen and Hoekstra (2011)	Chaudhary and Brooks (2018)	Moberg et al. (2019)
	Rest of the world	Open-field	0.333065	3.12824	444.58	26.486	0	45.3855	0.00397225	3.02925e-11	2.53715e-11	2.76405e-11	8.65205e-12	1.86613e-10	3.1732	FAOSTAT (2019)	Moberg et al. (2019)*, updated with inventory data of yield levels (FAOSTAT, 2019), nitrogen application (average of other production countries), impact from transportation (Moberg et al., 2019) and waste and losses along the chain (Moberg et al., 2019).	FAOSTAT (2019)	Average of other production countries		Average of other production countries	Mekonnen and Hoekstra (2011)	Chaudhary and Brooks (2018)	Moberg et al. (2019)
Cocoa powder
Cocoa powder	Ivory Coast	Open-field	0.338373	4.43715	532.84	26.077	0	5.2154	0	2.02912e-11	1.28293e-11	2.2698e-11	6.76108e-12	3.93207e-11	2.93357	FAOSTAT (2019)	Moberg et al. (2019)*	Moberg et al. (2019)	Moberg et al. (2019)		Ecoinvent version 3.5 "Cocoa bean production, sun-dried, CI" (Ecoinvent centre, 2018)	Mekonnen and Hoekstra (2011)	Chaudhary and Brooks (2018)	Moberg et al. (2019)
	Ghana	Open-field	0.177999	4.72	505.8	0	0	59.7663	0	1.54636e-11	9.68059e-12	1.48416e-11	6.08227e-12	2.93237e-11	2.93357	FAOSTAT (2019)	Moberg et al. (2019)*, updated with inventory data of yield levels (FAOSTAT, 2019), nitrogen application (Ecoinvent version 3.5 "Cocoa bean production, sun-dried, GH" from Ecoinvent centre, 2018), impact from transportation (Moberg et al., 2019) and waste and losses along the chain (Moberg et al., 2019).	FAOSTAT (2019)	Ecoinvent version 3.5 "Cocoa bean production, sun-dried, GH" (Ecoinvent centre, 2018)		Ecoinvent version 3.5 "Cocoa bean production, sun-dried, GH" (Ecoinvent centre, 2018)	Mekonnen and Hoekstra (2011)	Chaudhary and Brooks (2018)	Moberg et al. (2019)
	Indonesia	Open-field	0.150563	7.87639	398.74	53.381	0	71.1747	0	5.51227e-11	5.36047e-11	4.53818e-11	1.31128e-11	4.91196e-10	2.93357	FAOSTAT (2019)	Moberg et al. (2019)*, updated with inventory data of yield levels (FAOSTAT, 2019), nitrogen application (Ecoinvent version 3.5 "Cocoa bean production, sun-dried, ID" from Ecoinvent centre, 2018), impact from transportation (Moberg et al., 2019) and waste and losses along the chain (Moberg et al., 2019).	FAOSTAT (2019)	Ecoinvent version 3.5 "Cocoa bean production, sun-dried, ID" (Ecoinvent centre, 2018)		Ecoinvent version 3.5 "Cocoa bean production, sun-dried, ID" (Ecoinvent centre, 2018)	Mekonnen and Hoekstra (2011)	Chaudhary and Brooks (2018)	Moberg et al. (2019)
	Rest of the world	Open-field	0.333065	4.21735	444.58	26.486	0	45.3855	0.00397225	3.02925e-11	2.53715e-11	2.76405e-11	8.65205e-12	1.86613e-10	2.47262	FAOSTAT (2019)	Moberg et al. (2019)*, updated with inventory data of yield levels (FAOSTAT, 2019), nitrogen application (average of other production countries), impact from transportation (Moberg et al., 2019) and waste and losses along the chain (Moberg et al., 2019).	FAOSTAT (2019)	Average of other production countries		Average of other production countries	Mekonnen and Hoekstra (2011)	Chaudhary and Brooks (2018)	Moberg et al. (2019)
Cocoa butter
Cocoa butter	Ivory Coast	Open-field	0.338373	8.78602	532.84	26.077	0	5.2154	0	2.02912e-11	1.28293e-11	2.2698e-11	6.76108e-12	3.93207e-11	6.27459	FAOSTAT (2019)	Moberg et al. (2019)*	Moberg et al. (2019)	Moberg et al. (2019)		Ecoinvent version 3.5 "Cocoa bean production, sun-dried, CI" (Ecoinvent centre, 2018)	Mekonnen and Hoekstra (2011)	Chaudhary and Brooks (2018)	Moberg et al. (2019)
	Ghana	Open-field	0.177999	6.41	505.8	0	0	59.7663	0	1.54636e-11	9.68059e-12	1.48416e-11	6.08227e-12	2.93237e-11	6.27459	FAOSTAT (2019)	Moberg et al. (2019)*, updated with inventory data of yield levels (FAOSTAT, 2019), nitrogen application (Ecoinvent version 3.5 "Cocoa bean production, sun-dried, GH" from Ecoinvent centre, 2018), impact from transportation (Moberg et al., 2019) and waste and losses along the chain (Moberg et al., 2019).	FAOSTAT (2019)	Ecoinvent version 3.5 "Cocoa bean production, sun-dried, GH" (Ecoinvent centre, 2018)		Ecoinvent version 3.5 "Cocoa bean production, sun-dried, GH" (Ecoinvent centre, 2018)	Mekonnen and Hoekstra (2011)	Chaudhary and Brooks (2018)	Moberg et al. (2019)
	Indonesia	Open-field	0.150563	15.9567	398.74	53.381	0	71.1747	0	5.51227e-11	5.36047e-11	4.53818e-11	1.31128e-11	4.91196e-10	6.27459	FAOSTAT (2019)	Moberg et al. (2019)*, updated with inventory data of yield levels (FAOSTAT, 2019), nitrogen application (Ecoinvent version 3.5 "Cocoa bean production, sun-dried, ID" from Ecoinvent centre, 2018), impact from transportation (Moberg et al., 2019) and waste and losses along the chain (Moberg et al., 2019).	FAOSTAT (2019)	Ecoinvent version 3.5 "Cocoa bean production, sun-dried, ID" (Ecoinvent centre, 2018)		Ecoinvent version 3.5 "Cocoa bean production, sun-dried, ID" (Ecoinvent centre, 2018)	Mekonnen and Hoekstra (2011)	Chaudhary and Brooks (2018)	Moberg et al. (2019)
	Rest of the world	Open-field	0.333065	8.27031	444.58	26.486	0	45.3855	0.00397225	3.02925e-11	2.53715e-11	2.76405e-11	8.65205e-12	1.86613e-10	5.28866	FAOSTAT (2019)	Moberg et al. (2019)*, updated with inventory data of yield levels (FAOSTAT, 2019), nitrogen application (average of other production countries), impact from transportation (Moberg et al., 2019) and waste and losses along the chain (Moberg et al., 2019).	FAOSTAT (2019)	Average of other production countries		Average of other production countries	Mekonnen and Hoekstra (2011)	Chaudhary and Brooks (2018)	Moberg et al. (2019)
Coffee
	Brazil	Open-field	0.34	6.32945	1371	131	0	26.6583	0.181453	1.00409e-11	1.53821e-11	2.19775e-11	1.14038e-12	1.19149e-10	2.76235	Moberg et al. (2019)	Moberg et al. (2019)*	Moberg et al. (2019)	Moberg et al. (2019)		Ecoinvent version 3.5 "Coffee green bean production, arabica, BR" (Ecoinvent centre, 2018)	Mekonnen and Hoekstra (2011)	Chaudhary and Brooks (2018)	Moberg et al. (2019)
	Rest of the world	Open-field	0.66	6.44578	839	81	0	16.3139	0.11648	1.00409e-11	1.53821e-11	2.19775e-11	1.14038e-12	1.19149e-10	2.45623	Moberg et al. (2019)	Moberg et al. (2019)*	Moberg et al. (2019)	Moberg et al. (2019)		Ecoinvent version 3.5 "Coffee green bean production, arabica, RoW" (Ecoinvent centre, 2018)	Mekonnen and Hoekstra (2011)	Chaudhary and Brooks (2018)	Moberg et al. (2019)
Olives and olive oil
	Greece	Open-field	0.11	3.76931	2733	40	0	32.796	0.218	6.31512e-12	1.2421e-12	7.93328e-12	6.04739e-12	5.59597e-10	9.8164	Moberg et al. (2019)	Moberg et al. (2019)*	Moberg et al. (2019)	Moberg et al. (2019)		Ecoinvent version 3.5 "Olive production, RoW" (Ecoinvent centre, 2018)	Mekonnen and Hoekstra (2011)	Chaudhary and Brooks (2018)	Moberg et al. (2019)
	Italy	Open-field	0.56	4.48937	2314	40	0	13.4535	0.126416	6.21666e-12	1.58946e-12	1.33279e-11	3.23449e-12	3.89715e-10	9.8164	Moberg et al. (2019)	Moberg et al. (2019)*	Moberg et al. (2019)	Moberg et al. (2019)		Ecoinvent version 3.5 "Olive production, IT" (Ecoinvent centre, 2018)	Mekonnen and Hoekstra (2011)	Chaudhary and Brooks (2018)	Moberg et al. (2019)
	Spain	Open-field	0.28	3.36656	2723	33	0	32.676	0.537	3.77382e-12	2.58194e-12	3.87264e-12	7.38592e-12	6.70254e-10	9.8164	Moberg et al. (2019)	Moberg et al. (2019)*	Moberg et al. (2019)	Moberg et al. (2019)		Ecoinvent version 3.5 "Olive production, ES" (Ecoinvent centre, 2018)	Mekonnen and Hoekstra (2011)	Chaudhary and Brooks (2018)	Moberg et al. (2019)
	Rest of Europe	Open-field	0.05	3.47076	2504	30	0	30.048	0.293805	5.4352e-12	1.8045e-12	8.37794e-12	5.55593e-12	5.39855e-10	9.8164	Moberg et al. (2019)	Moberg et al. (2019)*	Moberg et al. (2019)	Moberg et al. (2019)		Ecoinvent version 3.5 "Olive production, RoW" (Ecoinvent centre, 2018)	Mekonnen and Hoekstra (2011)	Chaudhary and Brooks (2018)	Moberg et al. (2019)
Grapes
	Italy	Open-field	0.10522	0.47458	10734.2	21.4684	0	14.2765	0.0322993	6.21666e-12	1.58946e-12	1.33279e-11	3.23449e-12	3.89715e-10	1.19346	SS (2019)	Ecoinvent version 3.5 "Grape production, GLO" (Ecoinvent centre, 2018), adjusted to match methodology in Moberg et al. (2019).	FAOSTAT (2019)	Ecoinvent version 3.5 "Grape production, GLO" (Ecoinvent centre, 2018)		Ecoinvent version 3.5 "Grape production, GLO" (Ecoinvent centre, 2018)	Mekonnen and Hoekstra (2011)	Chaudhary and Brooks (2018)	Moberg et al. (2019)
	The Netherlands	Open-field	0.207181	0.355234	5592.3	11.1846	0	7.43776	0	1.55658e-12	1.06189e-12	8.88417e-13	1.79103e-13	5.29821e-12	1.19346	SS (2019)	Ecoinvent version 3.5 "Grape production, GLO" (Ecoinvent centre, 2018), adjusted to match methodology in Moberg et al. (2019).	FAOSTAT (2019)	Ecoinvent version 3.5 "Grape production, GLO" (Ecoinvent centre, 2018)		Ecoinvent version 3.5 "Grape production, GLO" (Ecoinvent centre, 2018)	Mekonnen and Hoekstra (2011)	Chaudhary and Brooks (2018)	Moberg et al. (2019)
	United States	Open-field	0.159326	0.587739	17291.5	34.5829	0	22.9976	0.209631	2.94397e-12	4.84771e-12	5.29033e-12	1.38977e-12	5.51594e-11	1.18103	SS (2019)	Ecoinvent version 3.5 "Grape production, GLO" (Ecoinvent centre, 2018), adjusted to match methodology in Moberg et al. (2019).	FAOSTAT (2019)	Ecoinvent version 3.5 "Grape production, GLO" (Ecoinvent centre, 2018)		Ecoinvent version 3.5 "Grape production, GLO" (Ecoinvent centre, 2018)	Mekonnen and Hoekstra (2011)	Chaudhary and Brooks (2018)	Moberg et al. (2019)
	Rest of the world	Open-field	0.528272	0.820092	10435.2	20.8705	0	13.8789	0.0966245	3.5724e-12	2.49968e-12	6.50221e-12	1.60112e-12	1.50058e-10	1.37219	SS (2019)	Ecoinvent version 3.5 "Grape production, GLO" (Ecoinvent centre, 2018), adjusted to match methodology in Moberg et al. (2019).	FAOSTAT (2019)	Ecoinvent version 3.5 "Grape production, GLO" (Ecoinvent centre, 2018)		Ecoinvent version 3.5 "Grape production, GLO" (Ecoinvent centre, 2018)	Mekonnen and Hoekstra (2011)	Chaudhary and Brooks (2018)	Moberg et al. (2019)
Peach
	Spain	Open-field	0.56	0.438701	16537	8.57472	0	33.6864	0.223729	3.77382e-12	2.58194e-12	3.87264e-12	7.38592e-12	6.70254e-10	1.19346	SS (2019)	Ecoinvent version 3.5 "Peach production, ES" (Ecoinvent centre, 2018), adjusted to match methodology in Moberg et al. (2019).	FAOSTAT (2019)	Ecoinvent version 3.5 "Peach production, ES" (Ecoinvent centre, 2018)		Ecoinvent version 3.5 "Peach production, ES" (Ecoinvent centre, 2018)	Mekonnen and Hoekstra (2011)	Chaudhary and Brooks (2018)	Moberg et al. (2019)
	Italy	Open-field	0.43	0.521375	18791.7	55.5209	0	25.625	0.0764157	6.21666e-12	1.58946e-12	1.33279e-11	3.23449e-12	3.89715e-10	1.19346	SS (2019)	Ecoinvent version 3.5 "Peach production, IT" (Ecoinvent centre, 2018), adjusted to match methodology in Moberg et al. (2019).	FAOSTAT (2019)	Ecoinvent version 3.5 "Peach production, IT" (Ecoinvent centre, 2018)		Ecoinvent version 3.5 "Peach production, IT" (Ecoinvent centre, 2018)	Mekonnen and Hoekstra (2011)	Chaudhary and Brooks (2018)	Moberg et al. (2019)
	Rest of the world	Open-field	0.01	1.21212	14305.8	152.595	0	38.1489	0.18786	4.99524e-12	2.0857e-12	8.60027e-12	5.3102e-12	5.29985e-10	1.37219	SS (2019)	Ecoinvent version 3.5 "Peach production, RoW" (Ecoinvent centre, 2018), adjusted to match methodology in Moberg et al. (2019).	FAOSTAT (2019)	Ecoinvent version 3.5 "Peach production, RoW" (Ecoinvent centre, 2018)		Ecoinvent version 3.5 "Peach production, RoW" (Ecoinvent centre, 2018)	Mekonnen and Hoekstra (2011)	Chaudhary and Brooks (2018)	Moberg et al. (2019)
Peanuts
	Argentina	Open-field	0.407402	1.66703	2530.4	0	79	0	0.0451863	8.23054e-12	6.14268e-12	5.03981e-12	9.68311e-13	1.57081e-11	1.56123	SS (2019)	Ecoinvent version 3.5 "Peanut production AR" (Ecoinvent centre, 2018), adjusted to match methodology in Moberg et al. (2019).	FAOSTAT (2019)	Ecoinvent version 3.5 "Peanut production AR" (Ecoinvent centre, 2018)	Lassaletta et al. (2014)	Ecoinvent version 3.5 "Peanut production AR" (Ecoinvent centre, 2018)	Mekonnen and Hoekstra (2011)	Chaudhary and Brooks (2018)	Moberg et al. (2019), FAO (1994a)
	China	Open-field	0.149853	1.31527	3598.1	82.2423	79	27.7568	0.0852229	5.20309e-12	4.94199e-12	8.62339e-12	1.22446e-12	4.78311e-11	1.51193	SS (2019)	Ecoinvent version 3.5 "Peanut production, CN" (Ecoinvent centre, 2018), adjusted to match methodology in Moberg et al. (2019).	FAOSTAT (2019)	Ecoinvent version 3.5 "Peanut production, CN" (Ecoinvent centre, 2018)	Lassaletta et al. (2014)	Ecoinvent version 3.5 "Peanut production, CN" (Ecoinvent centre, 2018)	Mekonnen and Hoekstra (2011)	Chaudhary and Brooks (2018)	Moberg et al. (2019), FAO (1994a)
	Rest of the world	Open-field	0.442744	1.6463	1663.9	38.032	79	12.8358	0.149808	6.71682e-12	5.54234e-12	6.8316e-12	1.09638e-12	3.17696e-11	1.55948	SS (2019)	Ecoinvent version 3.5 "Peanut production, RoW" (Ecoinvent centre, 2018), adjusted to match methodology in Moberg et al. (2019).	FAOSTAT (2019)	Ecoinvent version 3.5 "Peanut production, RoW" (Ecoinvent centre, 2018)	Lassaletta et al. (2014)	Ecoinvent version 3.5 "Peanut production, RoW" (Ecoinvent centre, 2018)	Mekonnen and Hoekstra (2011)	Chaudhary and Brooks (2018)	Moberg et al. (2019), FAO (1994a)
Almonds
	United States	Open-field	0.435558	3.96793	1151.26	186.677	0	0	2.03751	2.94397e-12	4.84771e-12	5.29033e-12	1.38977e-12	5.51594e-11	1.89025	FAOSTAT (2019)	Ecoinvent version 3.5 "Almond production, US" (Ecoinvent centre, 2018), adjusted to match methodology in Moberg et al. (2019).	FAOSTAT (2019)	Ecoinvent version 3.5 "Almond production, US" (Ecoinvent centre, 2018)		Ecoinvent version 3.5 "Almond production, US" (Ecoinvent centre, 2018)	Mekonnen and Hoekstra (2011)	Chaudhary and Brooks (2018)	Moberg et al. (2019), FAO (1994b), Poore & Nemecek (2018)
	Spain	Open-field	0.0966468	4.26868	384.8	31.0323	0	0	1.00001	3.77382e-12	2.58194e-12	3.87264e-12	7.38592e-12	6.70254e-10	1.90934	FAOSTAT (2019)	Ecoinvent version 3.5 "Almond production, RoW" (Ecoinvent centre, 2018), adjusted to match methodology in Moberg et al. (2019).	FAOSTAT (2019)	Ecoinvent version 3.5 "Almond production, RoW" (Ecoinvent centre, 2018)		Ecoinvent version 3.5 "Almond production, RoW" (Ecoinvent centre, 2018)	Mekonnen and Hoekstra (2011)	Chaudhary and Brooks (2018)	Moberg et al. (2019), FAO (1994b), Poore & Nemecek (2018)
	Rest of the world	Open-field	0.467795	5.1824	2314.8	92.8435	0	0	1.90798	3.35889e-12	3.71483e-12	4.58149e-12	4.38784e-12	3.62707e-10	2.01	FAOSTAT (2019)	Ecoinvent version 3.5 "Almond production, RoW" (Ecoinvent centre, 2018), adjusted to match methodology in Moberg et al. (2019).	FAOSTAT (2019)	Ecoinvent version 3.5 "Almond production, RoW" (Ecoinvent centre, 2018)		Ecoinvent version 3.5 "Almond production, RoW" (Ecoinvent centre, 2018)	Mekonnen and Hoekstra (2011)	Chaudhary and Brooks (2018)	Moberg et al. (2019), FAO (1994b), Poore & Nemecek (2018)
Tea
	China	Open-field	0.365973	6.48908	1038.62	33.047	0	9.442	0.797802	5.20309e-12	4.94199e-12	8.62339e-12	1.22446e-12	4.78311e-11	4.22017	SS (2019)	Ecoinvent version 3.5 "Tea production, dried, CN" (Ecoinvent centre, 2018), adjusted to match methodology in Moberg et al. (2019).	FAOSTAT (2019)	Ecoinvent version 3.5 "Tea production, dried, CN" (Ecoinvent centre, 2018)		Ecoinvent version 3.5 "Tea production, dried, CN" (Ecoinvent centre, 2018)	Mekonnen and Hoekstra (2011)	Chaudhary and Brooks (2018)	Moberg et al. (2019), Chapagain and Hoekstra (2007).
	India	Open-field	0.221615	6.6859	2004.06	63.7655	0	18.2187	1.33248	7.30365e-12	1.08872e-11	2.12645e-11	9.7259e-12	1.79946e-10	4.80347	SS (2019)	Ecoinvent version 3.5 "Tea production, dried, RoW" (Ecoinvent centre, 2018), adjusted to match methodology in Moberg et al. (2019).	FAOSTAT (2019)	Ecoinvent version 3.5 "Tea production, dried, RoW" (Ecoinvent centre, 2018)		Ecoinvent version 3.5 "Tea production, dried, RoW" (Ecoinvent centre, 2018)	Mekonnen and Hoekstra (2011)	Chaudhary and Brooks (2018)	Moberg et al. (2019), Chapagain and Hoekstra (2007).
	Rest of the world	Open-field	0.412411	6.05877	1456.04	46.3285	0	13.2367	0.898261	6.25337e-12	7.91461e-12	1.49439e-11	5.47518e-12	1.13888e-10	4.35291	SS (2019)	Ecoinvent version 3.5 "Tea production, dried, RoW" (Ecoinvent centre, 2018), adjusted to match methodology in Moberg et al. (2019).	FAOSTAT (2019)	Ecoinvent version 3.5 "Tea production, dried, RoW" (Ecoinvent centre, 2018)		Ecoinvent version 3.5 "Tea production, dried, RoW" (Ecoinvent centre, 2018)	Mekonnen and Hoekstra (2011)	Chaudhary and Brooks (2018)	Moberg et al. (2019), Chapagain and Hoekstra (2007).
Spices and herbs
Dill	Sweden	Open-field	0.0620853	1.10971	4811.43	90.3068		25.9077	0.034164	4.99262e-13	7.6197e-13	6.94103e-14	7.14026e-15	1.53429e-12	1.38889	SS (2019)	Landquist and Woodhouse (2015), adjusted to yield levels according to SBA (2019) and adjusted to match methodology in Moberg et al. (2019).	SBA (2019)	Landquist and Woodhouse (2015), adjusted to yield levels according to SBA (2019)		Landquist and Woodhouse (2015), adjusted to yield levels according to SBA (2019)	Landquist and Woodhouse (2015), adjusted to yield levels according to SBA (2019)	Chaudhary and Brooks (2018)	Moberg et al. (2019); Landquist and Woodhouse (2015)
Parsley	Sweden	Open-field	0.0620853	0.851178	6410.26	121.083		21.3675	0.0237417	4.99262e-13	7.6197e-13	6.94103e-14	7.14026e-15	1.53429e-12	1.19048	SS (2019)	Landquist and Woodhouse (2015), adjusted to yield levels according to SBA (2019) and adjusted to match methodology in Moberg et al. (2019).	SBA (2019)	Landquist and Woodhouse (2015), adjusted to yield levels according to SBA (2019)		Landquist and Woodhouse (2015), adjusted to yield levels according to SBA (2019)	Landquist and Woodhouse (2015), adjusted to yield levels according to SBA (2019)	Chaudhary and Brooks (2018)	Moberg et al. (2019); Landquist and Woodhouse (2015)
Dry chillies and peppers, ginger and spices	India	Open-field	0.379364		7005.09					7.30365e-12	1.08872e-11	2.12645e-11	9.7259e-12	1.79946e-10	1.23238	SS (2019); FAOSTAT (2019)		FAOSTAT (2019)					Chaudhary and Brooks (2018)	Moberg et al. (2019)
Dry chillies and peppers, ginger and spices	China	Open-field	0.0891659		2951.61					5.20309e-12	4.94199e-12	8.62339e-12	1.22446e-12	4.78311e-11	1.628	SS (2019); FAOSTAT (2019)		FAOSTAT (2019)					Chaudhary and Brooks (2018)	Moberg et al. (2019)
Dry chillies and peppers, ginger and spices	Rest of the world	Open-field	0.407299		3889.79					4.33533e-12	5.5304e-12	9.98577e-12	3.6525e-12	7.6437e-11	1.37219	SS (2019); FAOSTAT (2019)		FAOSTAT (2019)					Chaudhary and Brooks (2018)	Moberg et al. (2019)
	*Limited traceability of import countries. Rest of the world-average is used for all environmental categories except for biodiversity impacts where largest production countries globally are used in the caluclations based on FAOSTAT (2019).																*Data from Moberg et al. (2019) represents data of GHG emissions of foods per kg or liter product, accounting for the emissions arising from cradle to retail-gate, characterization factors GWP100 with climate-carbon feedbacks, soil carbon changes with ICBM 100 years, emissions from land use change included. Minor updates to the material has been made with regards to: Update of fertiliser data fro…
Feed ingredients for aquaculture and animal production							References
Product	Yield, kg/ha	Nitrogen fertilizer application rate, kg N/ha	Nitrogen fixation, kg N/ha	Phosphorus application rate, kg P/ha	Blue freshwater consumption, m3/kg	Factor for losses and waste, including economic allocation of by-products	Yield	Nitrogen fertilizer application	Nitrogen fixation	Phosphorus fertilizer application	Freshwater consumption	Factor for losses and waste, including economic allocation of by-products
AQUACULTURE
Marine oils	Assumed to be zero	Assumed to be zero	Assumed to be zero	Assumed to be zero	Assumed to be zero
Marine protein	Assumed to be zero	Assumed to be zero	Assumed to be zero	Assumed to be zero	Assumed to be zero
Soy protein	2816 (for soybeans)	10 (for soybeans)	186 (for soybeans)	32 (for soybeans)	0.07 (for soybeans)	0.828025	FAOSTAT (2019), average of largest production countries	Flysjö (2008), adjusted to yield levels of largest production countries according to FAOSTAT (2019)	Lassaletta et al. (2014), of largest production countries according to FAOSTAT (2019)	Flysjö (2008), adjusted to yield levels of largest production countries according to FAOSTAT (2019)	Mekonnen and Hoekstra (2011)	Moberg et al. (2019), Flysjö (2088)
By-products cereal industry	6577 (for grains)	123 (for grains)	0 (for grains)	11 (for grains)	0 (for grains)	0.432688	Calculated based on data from grains for human consumption in this study but without waste and losses at reatiler.	Calculated based on data from grains for human consumption in this study but without waste and losses at reatiler.		Calculated based on data from grains for human consumption in this study but without waste and losses at reatiler.	Calculated based on data from grains for human consumption in this study but without waste and losses at reatiler.	Moberg et al. (2019)
Sunflower meal	1780 (for sunflower seeds)	119 (for sunflower seeds)	0 (for sunflower seeds)	71 (for sunflower seeds)	0.293 (for sunflower seeds)	0.3	FAOSTAT (2019), average of largest production countries	Nilsson et al. (2010), adjusted to yield levels of largest production countries according to FAOSTAT (2019)		Nilsson et al. (2010), adjusted to yield levels of largest production countries according to FAOSTAT (2019)	Mekonnen and Hoekstra (2011)	Moberg et al., (2019), Nilsson et al. (2010)
Peas and horsebeans	3138 (peas); 3456 (horsebeans)	0 (peas); 0 (horsebeans)	63 (peas); 80 (horsebeans)	21 (peas); 21 (horsebeans)	0 (peas); 0 (horsebeans)	1.06173	SBA (2019a)	SS (2019)	Lassaletta et al. (2014)	SS (2019)	Mekonnen and Hoekstra (2011)	Moberg et al. (2019)
Rapeseed oil	3363 (for rapeseed)	141 (for rapeseed)	0 (for rapeseed)	13 (for rapeseed)	0 (for rapeseed)	1.87479	Calculated based on data from rapeseed oil for human consumption in this study but without waste and losses at retailer.	Calculated based on data from rapeseed oil for human consumption in this study but without waste and losses at retailer.		Calculated based on data from rapeseed oil for human consumption in this study but without waste and losses at retailer.	Calculated based on data from rapeseed oil for human consumption in this study but without waste and losses at retailer.	Moberg et al. (2019)
Vitamins and minerals	Assumed to be zero	Assumed to be zero	Assumed to be zero	Assumed to be zero	Assumed to be zero							Moberg et al. (2019)
By-products rice	4535 (for rice)	93 (for rice)	33 (for rice)	30 (for rice)	0.362 (for rice)	0.29154	Calculated based on data from rice for human consumption in this study but without waste and losses at retailer.	Calculated based on data from rice for human consumption in this study but without waste and losses at retailer.		Calculated based on data from rice for human consumption in this study but without waste and losses at retailer.	Calculated based on data from rice for human consumption in this study but without waste and losses at retailer.	Moberg et al. (2019)
Cassava meal	Approximated with sunflower meal	Approximated with sunflower meal	Approximated with sunflower meal	Approximated with sunflower meal	Approximated with sunflower meal	Approximated with sunflower meal
Wheat flour	6821 (for wheat)	133 (for wheat)	9 (for wheat)	11 (for wheat)	0 (for wheat)	1.29875	Calculated based on data from wheat flour for human consumption in this study but without waste and losses at retailer.	Calculated based on data from wheat flour for human consumption in this study but without waste and losses at retailer.		Calculated based on data from wheat flour for human consumption in this study but without waste and losses at retailer.	Calculated based on data from wheat flour for human consumption in this study but without waste and losses at retailer.	Moberg et al. (2019)
Other ingredients	Average of other feed	Average of other feed	Average of other feed	Average of other feed	Average of other feed	Average of other feed
ANIMAL PRODUCTION
Grains	6577	123	0	11	0	1.10576	Calculated based on data from grains for human consumption in this study but with waste and losses until factory-gate.	Calculated based on data from grains for human consumption in this study but with waste and losses until factory-gate.		Calculated based on data from grains for human consumption in this study but with waste and losses until factory-gate.	Calculated based on data from grains for human consumption in this study but with waste and losses until factory-gate.	Moberg et al. (2019)
Maize silage	6692 (for maize)	100 (for maize)	0 (for maize)	16 (for maize)	0 (for maize)	0.78086	SBA (2019a)	Flysjö (2008)		Flysjö (2008)	Mekonnen and Hoekstra (2011)	Moberg et al. (2019), Flysjö (2008)
Protein concentrate
By-products cereal industry	6577 (for grains)	123 (for grains)	0 (for grains)	11 (for grains)	0 (for grains)	0.432688	Calculated based on data from grains for human consumption in this study but without waste and losses at reatiler.	Calculated based on data from grains for human consumption in this study but without waste and losses at reatiler.		Calculated based on data from grains for human consumption in this study but without waste and losses at reatiler.	Calculated based on data from grains for human consumption in this study but without waste and losses at reatiler.	Moberg et al. (2019)
Fats and fatty acids	Assumed to be zero	Assumed to be zero	Assumed to be zero	Assumed to be zero	Assumed to be zero
Palmkernal expels	17329 (for fresh fruit bunches)	96 (for fresh fruit bunches)	0 (for fresh fruit bunches)	28 (for fresh fruit bunches)	0 (for fresh fruit bunches)	1.08241	FAOSTAT (2019), average of largest production countries	Flysjö (2008), adjusted to yield levels of largest production countries according to FAOSTAT (2019)		Flysjö (2008), adjusted to yield levels of largest production countries according to FAOSTAT (2019)	Mekonnen and Hoekstra (2011)	Moberg et al. (2019), Flysjö (2008)
Rapeseed, whole	3363 (for rapeseed)	141 (for rapeseed)	0 (for rapeseed)	13 (for rapeseed)	0 (for rapeseed)	1.13955	Calculated based on data from rapeseed oil for human consumption in this study but without waste and losses at retailer.	Calculated based on data from rapeseed oil for human consumption in this study but without waste and losses at retailer.		Calculated based on data from rapeseed oil for human consumption in this study but without waste and losses at retailer.	Calculated based on data from rapeseed oil for human consumption in this study but without waste and losses at retailer.	Moberg et al. (2019)
Rapeseed, meal	3363 (for rapeseed)	141 (for rapeseed)	0 (for rapeseed)	13 (for rapeseed)	0 (for rapeseed)	0.53179	Calculated based on data from rapeseed oil for human consumption in this study but without waste and losses at retailer.	Calculated based on data from rapeseed oil for human consumption in this study but without waste and losses at retailer.		Calculated based on data from rapeseed oil for human consumption in this study but without waste and losses at retailer.	Calculated based on data from rapeseed oil for human consumption in this study but without waste and losses at retailer.	Moberg et al. (2019)
Minerals and salt	Assumed to be zero	Assumed to be zero	Assumed to be zero	Assumed to be zero	Assumed to be zero
Soy protein	2816 (for soybeans)	10 (for soybeans)	186 (for soybeans)	32 (for soybeans)	0.07 (for soybeans)	0.828025	FAOSTAT (2019), average of largest production countries	Flysjö (2008), adjusted to yield levels of largest production countries according to FAOSTAT (2019)	Lassaletta et al. (2014), of largest production countries according to FAOSTAT (2019)	Flysjö (2008), adjusted to yield levels of largest production countries according to FAOSTAT (2019)	Mekonnen and Hoekstra (2011)	Moberg et al. (2019), Flysjö (2088)
Peas and horsebeans	3138 (peas); 3456 (horsebeans)	0 (peas); 0 (horsebeans)	63 (peas); 80 (horsebeans)	21 (peas); 21 (horsebeans)	0 (peas); 0 (horsebeans)	1.06173	SBA (2019a)	SS (2019)	Lassaletta et al. (2014)	SS (2019)	Mekonnen and Hoekstra (2011)	Moberg et al. (2019)
By-products sugar industry	64140 (for sugar beet)	98 (for sugar beet)	0 (for sugar beet)	16 (for sugar beet)	0.003 (for sugar beet)	4.33	Calculated based on data from sugar for human consumption in this study but with waste and losses until factory-gate.	Calculated based on data from sugar for human consumption in this study but with waste and losses until factory-gate.		Calculated based on data from sugar for human consumption in this study but with waste and losses until factory-gate.	Calculated based on data from sugar for human consumption in this study but with waste and losses until factory-gate.	Moberg et al. (2019)
Other protein feed	Average of other protein feed	Average of other protein feed	Average of other protein feed	Average of other protein feed	Average of other protein feed	Average of other protein feed
Forage	5502	63	193	2	0	1	SBA (2019a)	SS (2019)	Lassaletta et al. (2014)	SS (2019)	Assumed to be zero	Assumed to be 1 (no losses or waste)
Pasture (on arable land/natural meadows)	2927/1091	43/0	48/15	9/0	0	1	Flysjö et al. (2008), assumed that 31% pasture on arable land, the rest on natural meadows based on Cederberg et al. (2009a)	SS (2019), assumed that 31% pasture on arable land, the rest on natural meadows based on Cederberg et al. (2009a)	Cederberg and Nilsson (2004), assumed that 31% pasture on arable land, the rest on natural meadows based on Cederberg et al. (2009a)	SS (2019), assumed that 31% pasture on arable land, the rest on natural meadows based on Cederberg et al. (2009a)	Assumed to be zero	Assumed to be 1 (no losses or waste)
Characterization factor (CF) for potential species loss for feed in aquaculture and animal production			Cropland, intense use, potential species loss/m2					Pasture, intense use, potential species loss/m2					Reference
Product	Production country*	Market share*	CF mammals	CF birds	CF amphibians	CF reptiles	CF plants	CF mammals	CF birds	CF amphibians	CF reptiles	CF plants	Chaudhary and Brooks (2018)
Soy-based products
	Argentina	0.17953	8.23054e-12	6.14268e-12	5.03981e-12	9.68311e-13	1.57081e-11
	Brazil	0.288433	1.00409e-11	1.53821e-11	2.19775e-11	1.14038e-12	1.19149e-10
	United States	0.335029	2.94397e-12	4.84771e-12	5.29033e-12	1.38977e-12	5.51594e-11
	Rest of the world	0.197008	7.07182e-12	8.79083e-12	1.07692e-11	1.16615e-12	6.33387e-11
Oil palm-based products
	Indonesia	0.463807	5.51227e-11	5.36047e-11	4.53818e-11	1.31128e-11	4.91196e-10
	Malaysia	0.352451	5.09081e-11	3.11346e-11	6.97724e-11	2.5116e-11	5.99445e-10
	Rest of the world	0.183741	5.30154e-11	4.23696e-11	5.75771e-11	1.91144e-11	5.45321e-10
Sunflower meal
	Russia	0.209425	8.27909e-13	9.40142e-13	4.7066e-14	8.92954e-14	3.31381e-12
	Ukraine	0.25232	1.67531e-12	9.08857e-13	2.41244e-13	2.80719e-13	1.90019e-11
	Rest of the world	0.538256	1.25161e-12	9.24499e-13	1.44155e-13	1.85007e-13	1.11578e-11
Other crops
	Sweden		4.99262e-13	7.6197e-13	6.94103e-14	7.14026e-15	1.53429e-12	4.98226e-13	9.59902e-13	7.34888e-14	6.99902e-15	1.50394e-12
	Denmark		7.61283e-13	9.91146e-13	4.44588e-13	5.49635e-14	1.35691e-11	8.03567e-13	1.24491e-12	4.62868e-13	5.38762e-14	1.33007e-11
	Germany		1.58448e-12	9.11288e-13	6.43462e-13	1.40077e-13	8.46288e-12	1.62479e-12	1.15478e-12	6.70195e-13	1.37307e-13	8.29547e-12
	Ireland		3.18325e-13	1.40016e-12	8.59771e-14	5.10952e-15	1.06862e-11	3.63521e-13	1.65483e-12	9.00257e-14	5.01353e-15	1.04854e-11
	Poland		1.45837e-12	9.24615e-13	3.36555e-13	3.59608e-14	1.31904e-11	1.43588e-12	1.19343e-12	3.5225e-13	3.52495e-14	1.29294e-11
	Vietnam		2.55915e-11	2.29878e-11	5.37236e-11	2.18182e-11	1.7213e-10
	Norway		3.72815e-13	7.65213e-13	2.47398e-14	5.36898e-15	3.42404e-12
	*The production of feed is assumed to take place in the production country of the aquaculture or animal production system, except for soy-based and oil palm-based products as well as sunflower meal where production countries and market shares are assumed to be largest production countries globally based on FAOSTAT (2019).
Sheep meat									Cropland, intense use, potential species loss/m2					Pasture, intense use, potential species loss/m2					References
Production country	Market share	GHG emissions, kg CO2e/kg bone free weight	Cropland use, m2/kg carcass weight	Pasture use, m2/kg carcass weight	Nitrogen fertilizer application, kg N/kg carcass weight	Nitrogen fixation, kg N/carcass weight	Phosphorus fertilizer application, kg P/carcass weight	Freshwater consumption, m3/kg live weight	CF mammals	CF birds	CF amphibians	CF reptiles	CF plants	CF mammals	CF birds	CF amphibians	CF reptiles	CF plants	Market share	GHG emissions	Cropland use	Pasture use	Nitrogen fertilizer application	Nitrogen fixation	Phosphorus fertilizer application	Freshwater consumption	Extinction rate
Sweden	0.33	32.6881	33	114	0.24	0.21	0.037	0.162	4.99262e-13	7.6197e-13	6.94103e-14	7.14026e-15	1.53429e-12	4.98226e-13	9.59902e-13	7.34888e-14	6.99902e-15	1.50394e-12	SS (2019), SBA (2019b)	Wallman et al. (2011), adjusted to methodology in Moberg et al. (2019)	Wallman et al. (2011)	Wallman et al. (2011)	Wallman et al. (2011)	Wallman et al. (2011)	Wallman et al. (2011)	Mekonnen and Hoekstra (2012)	Chaudhary and Brooks (2018)
Ireland	0.18	33.9998	4.55864	97.1988	0.24	0.21	0.037	0.169	3.18325e-13	1.40016e-12	8.59771e-14	5.10952e-15	1.06862e-11	3.63521e-13	1.65483e-12	9.00257e-14	5.01353e-15	1.04854e-11	SS (2019), SBA (2019b)	O'Brien et al. (2016), adjusted to methodology in Moberg et al. (2019). 85% corresponding to average lowland farms, 15% to average hill farms.	O'Brien et al. (2016). 85% corresponding to average lowland farms, 15% to average hill farms.	O'Brien et al. (2016). 85% corresponding to average lowland farms, 15% to average hill farms.	Assumed the same nitrogen fertilizer application as Sweden	Assumed the same nitrogen fixation as Sweden	Assumed the same phosphorus fertilizer application as Sweden	Mekonnen and Hoekstra (2012)	Chaudhary and Brooks (2018)
New Zealand	0.2	34.6878	18.7793	105.599	0.24	0.21	0.037	0.197	2.06104e-12	4.2245e-11	3.98488e-12	4.20036e-12	6.62145e-10	1.49831e-12	4.64321e-11	3.98488e-12	4.12145e-12	6.6228e-10	SS (2019), SBA (2019b)	Ledgard et al. (2011), adjusted to methodology in Moberg et al. (2019)	Average of other production countries	Average of other production countries	Assumed the same nitrogen fertilizer application as Sweden	Assumed the same nitrogen fixation as Sweden	Assumed the same phosphorus fertilizer application as Sweden	Mekonnen and Hoekstra (2012)	Chaudhary and Brooks (2018)
Rest of the world	0.29	34.0587	18.7793	105.599	0.24	0.21	0.037	0.207	9.59542e-13	1.48024e-11	1.38009e-12	1.4042e-12	2.24789e-10	7.86686e-13	1.6349e-11	1.3828e-12	1.37782e-12	2.24757e-10	SS (2019), SBA (2019b)	Average of other production countries	Average of other production countries	Average of other production countries	Assumed the same nitrogen fertilizer application as Sweden	Assumed the same nitrogen fixation as Sweden	Assumed the same phosphorus fertilizer application as Sweden	Mekonnen and Hoekstra (2012)	Chaudhary and Brooks (2018)
Potato starch			Reference
Production country	Market share	GHG emissions, kg CO2e/kg	Market share	GHG emissions
Sweden	0.7	1.23531	SBA (2015); SS (2019)	Ecoinvent version 3.5 "Potato starch production, RoW" (Ecoinvent centre, 2018), adjusted to methodology in Moberg et al. (2019)
Netherlands	0.271749	1.37432
Rest of Europe	0.0282514	1.51334
Honey				References
Production country	Market share	GHG emissions, kg CO2e/kg	Yield, kg/hive	Market share	GHG emissions	Yield per hive
Sweden	0.5	1.66289	29.2	SBA (2011), SS (2019)	Kendall et al. (2013), adjusted to methodology in Moberg et al. (2019)	Alfsdotter, A-S., pers. comm. (2019), European Commission (n.d.)
Denmark	0.183253	1.72256	29
Frankrike	0.132965	1.78223	22
Rest of the world	0.171981	2.4608	25.3
Confectionary		Reference
Average of:	GHG emissions, kg CO2e/kg	Nilsson, Sund, and Florén (2011), adjusted to match methodology in Moberg et al. (2019).
Foam sweets	4.58289
Jelly sweets	2.72109
Salt	GHG emissions, kg CO2e/kg	Reference	Comment to inventory data
	0.548557	Data from Ecoinvent version 3.5, "Sodium chloride production, powder, RoW" (Ecoinvent centre, 2018), adjusted to match methodology in Moberg et al. (2019).	Biodiversity impacts due to land occupation are assumed to be zero as the European mix consists of 41% solution mining and 59% rock salt. These are produced through underground mining (Ecoinvent version 3.5, "Sodium chloride production, powder, RER" (Ecoinvent centre, 2018)).
Wine							Characterization factor (CF), potential species loss/m2 (cropland, intense use)					References
Production country	Market share	GHG emissions, kg CO2e/liter	Yield, kg/ha	Nitrogen fertilizer application rate, kg N/ha	Phosphorus application rate, kg P/ha	Blue freshwater consumption, m3/kg	CF mammals	CF birds	CF amphibians	CF reptiles	CF plants	Production country and market share	GHG emissions	Yield	Nitrogen fertilizer application	Phosphorus fertilizer application	Freshwater consumption	Extinction rate
Italy	0.236816	2.1721	10734.2	21.4684	14.2765	0.0322993	6.21666e-12	1.58946e-12	1.33279e-11	3.23449e-12	3.89715e-10	SAM (2012;2013;2014;2015;2016)	Hallström et al. (2018), adjusted to match methodology in Moberg et al. (2019).	FAOstat (2019)	Ecoinvent version 3.5 "Grape production, GLO" (Ecoinvent centre, 2018)	Ecoinvent version 3.5 "Grape production, GLO" (Ecoinvent centre, 2018)	Mekonnen and Hoekstra (2012)	Chaudhary and Brooks (2018)
South Africa	0.163953	3.12576	16433.6	32.8672	21.8567	0.156751	7.81632e-12	9.97934e-12	8.42194e-12	2.40639e-12	6.97375e-10	SAM (2012;2013;2014;2015;2016)	Hallström et al. (2018), adjusted to match methodology in Moberg et al. (2019).	FAOstat (2019)	Ecoinvent version 3.5 "Grape production, GLO" (Ecoinvent centre, 2018)	Ecoinvent version 3.5 "Grape production, GLO" (Ecoinvent centre, 2018)	Mekonnen and Hoekstra (2012)	Chaudhary and Brooks (2018)
Australia	0.102517	2.50378	11332	22.6641	15.0716	0.137869	4.04113e-12	4.98231e-12	4.53226e-12	1.04754e-12	1.11712e-10	SAM (2012;2013;2014;2015;2016)	Hallström et al. (2018), adjusted to match methodology in Moberg et al. (2019).	FAOstat (2019)	Ecoinvent version 3.5 "Grape production, GLO" (Ecoinvent centre, 2018)	Ecoinvent version 3.5 "Grape production, GLO" (Ecoinvent centre, 2018)	Mekonnen and Hoekstra (2012)	Chaudhary and Brooks (2018)
Spain	0.103555	2.1721	6485.94	12.9719	8.6263	0.133968	3.77382e-12	2.58194e-12	3.87264e-12	7.38592e-12	6.70254e-10	SAM (2012;2013;2014;2015;2016)	Hallström et al. (2018), adjusted to match methodology in Moberg et al. (2019).	FAOstat (2019)	Ecoinvent version 3.5 "Grape production, GLO" (Ecoinvent centre, 2018)	Ecoinvent version 3.5 "Grape production, GLO" (Ecoinvent centre, 2018)	Mekonnen and Hoekstra (2012)	Chaudhary and Brooks (2018)
France	0.104911	2.05275	7913.5	15.827	10.525	0.003043	2.0321e-12	1.25706e-12	2.72146e-12	1.24427e-12	1.09804e-10	SAM (2012;2013;2014;2015;2016)	Hallström et al. (2018), adjusted to match methodology in Moberg et al. (2019).	FAOstat (2019)	Ecoinvent version 3.5 "Grape production, GLO" (Ecoinvent centre, 2018)	Ecoinvent version 3.5 "Grape production, GLO" (Ecoinvent centre, 2018)	Mekonnen and Hoekstra (2012)	Chaudhary and Brooks (2018)
Rest of the world	0.288248	2.77183	10435.2	20.8705	13.8789	0.0966245	4.77601e-12	4.07802e-12	6.57524e-12	3.06372e-12	3.95772e-10	SAM (2012;2013;2014;2015;2016)	Hallström et al. (2018), adjusted to match methodology in Moberg et al. (2019).	FAOstat (2019)	Ecoinvent version 3.5 "Grape production, GLO" (Ecoinvent centre, 2018)	Ecoinvent version 3.5 "Grape production, GLO" (Ecoinvent centre, 2018)	Mekonnen and Hoekstra (2012)	Chaudhary and Brooks (2018)
Spirits			Characterization factor (CF), potential species loss/m2 (cropland, intense use)					References
Production country	Market share	GHG emissions, kg CO2e/liter	CF mammals	CF birds	CF amphibians	CF reptiles	CF plants	Production country and market share	GHG emissions	Extinction rate
Sweden	0.0914466	1.51931	4.99262e-13	7.6197e-13	6.94103e-14	7.14026e-15	1.53429e-12	SAM (2012;2013;2014;2015;2016)	Hallström et al. (2018), adjusted to match methodology in Moberg et al. (2019).	Chaudhary and Brooks (2018)
United Kingdom	0.317035	1.50032	3.51416e-13	1.61934e-12	1.03018e-13	5.25724e-15	1.50944e-11	SAM (2012;2013;2014;2015;2016)	Hallström et al. (2018), adjusted to match methodology in Moberg et al. (2019).	Chaudhary and Brooks (2018)
Rest of the world	0.591518	2.32873	4.25339e-13	1.19066e-12	8.62142e-14	6.19875e-15	8.31433e-12	SAM (2012;2013;2014;2015;2016)	Hallström et al. (2018), adjusted to match methodology in Moberg et al. (2019).	Chaudhary and Brooks (2018)
Water consumption, service water for animals	Stable period, m3/head and year	Grazing period, m3/head and year	Reference
Beef production	15.622	8.8695	Mekonnen and Hoekstra (2012)
Dairy production	33.58	16.425
Pig production	22.265
Broiler (slaugher chicken) production	0.09855
Layer production	0.09855
Economic allocation factors for beef and pork meat		Reference
Beef/edible by-products	0.97/0.03	Alsterberg (2012); SBA (2019a)
Pork meat/edible by-products	0.94/0.06
Conversion factors for meat	Conversion factor from carcass weight to bone free meat	Conversion factor from live weight to bone free meat	Reference
Beef	0.695		Clune et al. (2017)
Pork meat	0.59
Poultry meat	0.77
Sheep meat	0.66	0.43
Ingredients for processed products
List of ingredients in Table S4 and Moberg et al. (2019). Updates with regard to density factors for juices and squash drinks based on Charrondiere, Haytowitz and Stadlmayr (2012).
Other inventory data for the products is shown in the table for animal feed but with the factors for waste, losses and allocation stated here.
	Factor for losses and waste, including economic allocation of by-products	Reference
Palm oil (from fresh fruit bunches to palm oil, kg)	4.76216	Flysjö (2008)
Soy lecithin (from soybeans to soybean oil, kg)*	2.17998	Flysjö (2008)
Sunflower oil (from sunflower seed to sunflower oil, kg)	2.05	Nilsson et al. (2010)
*Approximated with soybean oil based on Moberg et al. (2019).
Number of recognized species included in the analysis		Reference
Mammals	6495	Burgin et al. (2018)
Birds	10021	Dickinson and Remsen (2013); Dickinson and Christidis (2014)
Reptiles	9546	Pincheira-Donoso et al. (2013)
Amphibians	5948	Frost et al. (2006)
Plants	374000	Christenhusz and Byng (2016)
Total number included in the analysis	406010

## Sheet: Reference list
Reference list
Alsterberg, E., Animaliska restprodukter vid köttproduktion: Effektiv användning och livsmedelspotential. 2012.
Amcoff, E., Riksmaten-vuxna 2010-11: Livsmedels-och näringsintag bland vuxna i Sverige. 2012: Livsmedelsverket.
Blengini, G.A. and M. Busto, The life cycle of rice: LCA of alternative agri-food chain management systems in Vercelli (Italy). Journal of environmental management, 2009. 90(3): p. 1512-1522.
Burgin, C.J., et al., How many species of mammals are there? Journal of Mammalogy, 2018. 99(1): p. 1-14.
Cederberg, C., Greenhouse gas emissions from Swedish production of meat, milk and eggs 1990 and 2005. 2009a: SIK Institutet för livsmedel och bioteknik.
Cederberg, C., D. Meyer, and A. Flysjö, Life cycle inventory of greenhouse gas emissions and use of land and energy in Brazilian beef production. 2009b: SIK Institutet för livsmedel och bioteknik.
Cederberg, C. and B. Nilsson, Livscykelanalys (LCA) av ekologisk nötköttsproduktion i ranchdrift. 2004: SIK Institutet för livsmedel och bioteknik.
Chapagain, A.K. and A.Y. Hoekstra, The water footprint of coffee and tea consumption in the Netherlands. Ecological economics, 2007. 64(1): p. 109-118.
Charrondiere, U., D. Haytowitz, and B. Stadlmayr. FAO/INFOODS density database, version 2.0. in Food and agriculture organization of the United Nations technical workshop report. 2012.
Chaudhary, A. and T.M. Brooks, Land use intensity-specific global characterization factors to assess product biodiversity footprints. Environmental science & technology, 2018. 52(9): p. 5094-5104.
Clune, S., E. Crossin, and K. Verghese, Systematic review of greenhouse gas emissions for different fresh food categories. Journal of Cleaner Production, 2017. 140: p. 766-783.
Davis, J., Emissions of greenhouse gases from production of horticultural products: analysis of 17 products cultivated in Sweden. 2011: SIK Institutet för livsmedel och bioteknik.
Dickinson, E.C. and J.V.J. Remsen, The Howard and Moore Complete Checklist of the Birds of the World. 4 ed. Vol. 1. 2013, Non-Passerines, Aves Press, Eastbourne, U.K.
Dickinson, E.C. and L. Christidis, The Howard and Moore Complete Checklist of the Birds of the World. 4 ed. Vol. 2. 2014, Non-Passerines, Aves Press, Eastbourne, U.K.
Ecoinvent Centre, Ecoinvent Database Version 3.5. 2018, Swiss Centre for Life Cycle Inventories: Dübendorf, Switzerland.
European Commission. EU Beekeeping Sector. National Apiculture Programmes 2020-2022. N.d.; Available from: https://ec.europa.eu/agriculture/sites/agriculture/files/honey/programmes/programmes_en.pdf.
FAO, FAOSTAT Statistical Database. 2019, Food and Agricultural Organization of the United Nations.
FAO, Definition and classification of commodities, 6. OIL-BEARING CROPS AND DERIVED PRODUCTS. 1994a, Food and Agricultural Organization of the United Nations.
FAO, Definition and classification of commodities, 5. NUTS AND DERIVED PRODUCTS. 1994b, Food and Agricultural Organization of the United Nations.
Flysjö, A., C. Cederberg, and I. Strid, LCA-databas för konventionella fodermedel: miljöpåverkan i samband med produktion. 2008: SIK Institutet för livsmedel och bioteknik.
Frost, D.R., et al., The amphibian tree of life. Bulletin of the American Museum of natural History, 2006. 2006(297): p. 1-291.
Fusi, A., et al., Environmental profile of paddy rice cultivation with different straw management. Science of the Total Environment, 2014. 494: p. 119-128.
Garnett, T., The alcohol we drink and its contribution to the UK’s greenhouse gas emissions: a discussion paper. Centre for Environmental Strategy, University of Surrey, UK, 2007.
Hallström, E., et al., Climate impact of alcohol consumption in Sweden. Journal of cleaner production, 2018. 201: p. 287-294.
Kailis, S. and D.J. Harris, Producing table olives. 2007: Landlinks press.
Kendall, A., J. Yuan, and S.B. Brodt, Carbon footprint and air emissions inventories for US honey production: case studies. The International Journal of Life Cycle Assessment, 2013. 18(2): p. 392-400.
Landqvist, B. and A. Woodhouse, Klimatavtryck av rotfrukter, grönsaker och kryddor: analys av 10 produkter odlade i Sverige. 2015, SIK Institutet för livsmedel och bioteknik.
Lassaletta, L., et al., 50 year trends in nitrogen use efficiency of world cropping systems: the relationship between yield and nitrogen input to cropland. Environmental Research Letters, 2014. 9(10): p. 105011.
Ledgard, S.F., et al., Carbon footprinting of New Zealand lamb from the perspective of an exporting nation. Animal frontiers, 2011. 1(1): p. 40-45.
Mapama, GUÍA PRÁCTICA DE LA FERTILIZACIÓN RACIONAL DE LOS CULTIVOS EN ESPAÑA. Abonado de los principales cultivos en España. n.d.
Marmolin, C. and Björkholm A-M., Växtnäringsrekommendationer till frilandsgrönsaker En sammanställning av rekommendationer som ges i Sverige, Norge, Finland, Tyskland, Holland och UK. N.d., Hushållningssällskapet.
Mekonnen, M.M. and A.Y. Hoekstra, The green, blue and grey water footprint of crops and derived crop products. Hydrology and Earth System Sciences, 2011. 15(5): p. 1577-1600.
Mekonnen, M.M. and A.Y. Hoekstra, A global assessment of the water footprint of farm animal products. Ecosystems, 2012. 15(3): p. 401-415.
Moberg, E., et al., Determining the climate impact of food for use in a climate tax—design of a consistent and transparent model. The International Journal of Life Cycle Assessment, 2019: p. 1-14.
Nilsson, T. Gödsling av hallon. LTJ-fakultetens faktablad. Fakta från Tillväxt Trädgård, nr 8. 2011: Fakulteten för landskapsplanering, trädgårds- och jordbruksvetenskap. Swedish University of Agricultural Sciences.
Nilsson, K., V. Sund, and B. Florén, The environmental impact of the consumption of sweets, crisps and soft drinks. 2011: Nordic Council of Ministers.
Nilsson, K., et al., Comparative life cycle assessment of margarine and butter consumed in the UK, Germany and France. The International Journal of Life Cycle Assessment, 2010. 15(9): p. 916-926.
Notarnicola, B., G. Tassielli, and G. Nicoletti, Life cycle assessment (LCA) of wine production. Environmentally-friendly food processing, 2003. 306: p. 326.
O'Brien, D., et al., A life cycle assessment of the effect of intensification on the environmental impacts and resource use of grass-based sheep farming. Agricultural Systems, 2016. 148: p. 95-104.
Pincheira-Donoso, D., et al., Global taxonomic diversity of living reptiles. PLoS One, 2013. 8(3): p. e59741.
Poore, J. and T. Nemecek, Reducing food’s environmental impacts through producers and consumers. Science, 2018. 360(6392): p. 987-992.
Röös, E., Mat-klimat-listan. 2014.
Röös, E. and H. Karlsson, Effect of eating seasonal on the carbon footprint of Swedish vegetable consumption. Journal of Cleaner Production, 2013. 59: p. 63-72.
SBA, Statistical Database. 2019a, Swedish Board of Agriculture.
SBA. Marknadsrapport FÅR & LAMM - utvecklingen till och med 2018. 2019b: Swedish Board of Agriculture.
SBA, Energianvändning i växthus 2017. Tomat, gurka och prydnadsväxter. Greenhouse energy use in 2017. 2018, Swedish Board of Agriculture.
SBA. Marknadsöversikt potatis till mat och stärkelseproduktion. Fredagsmys och husmanskost. Rapport 2015:9, 2015: Swedish Board of Agriculture
SBA. Bli biodlare - utveckla ditt företag. Jordbruksinformation 14 - 2011, 2011: Swedish Board of Agriculture.
SBA. Gödslings- och kalkningsråd för fruktodling 2004. Jordbruksinformation 5 – 2004, 2004: Swedish Board of Agriculture.
Spruijt, J. and Van der Voort, M. Kwantitatieve Informatie Akkerbouw en Vollegrondsgroenteteelt 2015. 2015: Wageningen University & Research.
SS, Statistical Database. 2019, Statistics Sweden,.
Sveriges miljömål. Sveriges miljömål. 2019; Available from: http://www.sverigesmiljomal.se/
Swedish Alcohol Monopoly, Swedish Alcohol Monopoly Sales Statistcs. 2019; Available from: https://www.systembolaget.se/om-systembolaget/om-foretaget/forsaljningsstatistik/.
Swedish National Food Agency. Tables of raw agricultural commodities (RAC), n.d.
Velden, N.v.d. and P. Smit, Energiemonitor van de Nederlandse glastuinbouw 2017. 2018, Wageningen University & Research: Wageningen, the Netherlands.
Velden, N.v.d. and P. Smit, Energiemonitor van de Nederlandse glastuinbouw 2016. 2017, Wageningen University & Research: Wageningen, the Netherlands.
Wallman, M., C. Cederberg, and U. Sonesson, Life cycle assessment of Swedish lamb production. SIK Rapport, 2011(831).
Personal communication
Alfsdotter, A-S. 2019. Swedish Beekeepers Association.
Eidstedt, M. 2018. Swedish Board of Agriculture.
